# Supplementary material for: A population-based cross-sectional study of barriers to uptake of eye care services in South India: the Rapid Assessment of Visual Impairment (RAVI) project
Source: PubMed Central journal article supplement — BMJ Open. 2014 Jun 12;4(6):e005125. doi: 10.1136/bmjopen-2014-005125 (PMC4067889; doi:10.1136/bmjopen-2014-005125), 2014-06-12
Supplement: bmjopen-2014-005125.draft_revisions.pdf [file bmjopen-2014-005125.draft_revisions.pdf]

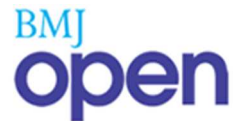

**Barriers to Uptake of Eye Care Services in South India: The Rapid Assessment of Visual Impairment (RAVI) Project**

|                                 |                                                                                                                                                                                                                                                                                                                                                                                           |
|---------------------------------|-------------------------------------------------------------------------------------------------------------------------------------------------------------------------------------------------------------------------------------------------------------------------------------------------------------------------------------------------------------------------------------------|
| Journal:                        | <i>BMJ Open</i>                                                                                                                                                                                                                                                                                                                                                                           |
| Manuscript ID:                  | bmjopen-2014-005125                                                                                                                                                                                                                                                                                                                                                                       |
| Article Type:                   | Research                                                                                                                                                                                                                                                                                                                                                                                  |
| Date Submitted by the Author:   | 25-Feb-2014                                                                                                                                                                                                                                                                                                                                                                               |
| Complete List of Authors:       | Marmamula, Srinivas; L V Prasad Eye Institute, Allen Foster Community Eye Health Research Centre, ICARE<br>Khanna, Rohit; L.V.prasad eye institute, Konegari, Shekhar; L V Prasad Eye Institute, Allen Foster Community Eye Health Research Centre, ICARE<br>Rao, Gullapalli; LV Prasad Eye Institute; L V Prasad Eye Institute, Allen Foster Community Eye Health Research Centre, ICARE |
| <b>Primary Subject Heading</b>: | Ophthalmology                                                                                                                                                                                                                                                                                                                                                                             |
| Secondary Subject Heading:      | Epidemiology, Ophthalmology, Public health                                                                                                                                                                                                                                                                                                                                                |
| Keywords:                       | PUBLIC HEALTH, Health policy < HEALTH SERVICES ADMINISTRATION & MANAGEMENT, EPIDEMIOLOGY, Quality in health care < HEALTH SERVICES ADMINISTRATION & MANAGEMENT                                                                                                                                                                                                                            |
|                                 |                                                                                                                                                                                                                                                                                                                                                                                           |

SCHOLARONE™  
Manuscripts

1  
2  
3 **Barriers to Uptake of Eye Care Services in South India: The Rapid Assessment of Visual**  
4 **Impairment (RAVI) Project**

5  
6 Srinivas Marmamula<sup>1,2</sup>, Rohit C. Khanna<sup>1</sup>, Konegari Shekhar<sup>1</sup>

7  
8 Gullapalli N Rao<sup>1,2</sup>

9  
10 <sup>1</sup> Allen Foster Community Eye Health Research Centre, Gullapalli Pratibha Rao International  
11 Centre for Advancement of Rural Eye care, L V Prasad Eye Institute, Hyderabad, India

12  
13 <sup>2</sup> Bausch & Lomb School of Optometry, L V Prasad Eye Institute, Hyderabad, India

14  
15  
16  
17  
18 **Running Head:** Barriers to uptake of eye care services in Andhra Pradesh, India

19  
20  
21 **Key words:** Visual Impairment; Cataract; Refractive errors; Barriers; Rapid assessment

22  
23 **Article Type:** Original article

24  
25  
26  
27  
28 **Address for correspondence:**

29  
30 Srinivas Marmamula, M.Sc, PhD

31  
32 Allen Foster Community Eye Health Research Centre

33  
34 ICARE, L V Prasad Eye Institute,

35  
36 Road # 2, Banjara Hills, Hyderabad, India- 500034

37  
38 E-mail: sriptom@lvpei.org

39  
40  
41  
42  
43  
44  
45  
46 **Manuscript word count:** 2364 words (excluding title page, abstract, references, figure  
47 legends and tables)

**ABSTRACT**

**Aim:** To assess the barriers to uptake of eye care services among those with visual impairment (VI) due to cataract or uncorrected refractive errors in an urban and rural population aged  $\geq 40$  years in South India state of Andhra Pradesh.

**Methods:** A population based cross-sectional study was conducted in which 7800 subjects were randomly selected from three districts. Eye examinations were conducted using a rapid assessment protocol. VI was defined as presenting visual acuity  $< 6/18$  in the better eye. A questionnaire was used to collect information on barriers for uptake of services among those who had avoidable VI.

**Results:** The prevalence of avoidable VI was 11.8% (95%:11.0–12.5). Among these 868 individuals, 71.1% (n=617) individuals reported 'person related' barriers while 28.9% (n=251) individuals reported 'service related' barriers for uptake of services. Among the 'person related' barriers, the leading barrier was 'lack of perceived need' (61.1%; n=377) for reasons such as old age, good vision in other eye. This was followed by 'no one to accompany' (20.3%; n=125) and 'fear of surgery or consultation' (6.6%; n=41). Of the 251 individuals who had 'service related' barriers, lack of affordability was the major barrier (76.1%; n=191) followed by lack of accessibility (12.7%; n=32). Over 11% (n=28) of the individuals were advised to wait for cataract surgery.

**Conclusions:** Person related barriers are more common than service related barriers in Andhra Pradesh. An eye care service delivery that can address these barriers by influencing an individual attitudinal change is required to address this challenge.

**ARTICLE SUMMARY****Article focus**

- Visual impairment is common in south Indian state of Andhra Pradesh.
- Despite availability of services, barriers limit the uptake of eye care services
- Understanding and addressing the barriers is essential to tackle the challenge of visual impairment

**Key messages**

- 'Person related' barrier are more common than 'service related' barriers in our study population
- There is trend towards 'person related' barriers compared to 'service related' barriers compared to earlier studies
- Lack of 'perceived need' and affordability are the leading barriers that prevent the uptake of services in the study region

**Strengths and limitations**

- Large representative sample from three districts, a good response rate and sound methodology are the strengths of the study
- The division of barriers into 'person related' and 'service related' is arbitrary and subject to discussion.

1  
2  
3 With over 285 million visually impaired people worldwide, visual impairment is a major  
4  
5 global public health challenge.[1] Over 80% of the blindness is due to cataract and  
6  
7 uncorrected refractive errors, both of which have cost-effective solutions.[1, 2] While  
8  
9 technological advances have rendered cataract surgery safe, resulting in excellent  
10  
11 outcomes, this technology needs to be accessible to people in remote rural areas in  
12  
13 developing nations where visual impairment is more prevalent.[1] Making services available  
14  
15 is only a part of the larger solution to the global problem of visual impairment. Even in  
16  
17 places where services are available and accessible,[3] the uptake of services is determined  
18  
19 by several factors or barriers that must be addressed if we are to improve the uptake of  
20  
21 services and thereby reduce the prevalence of visual impairment. Research shows that the  
22  
23 barriers that determine uptake of services tend to change over time are due to several  
24  
25 factors and hence current research on trends should guide service delivery to impact the  
26  
27 prevalence of avoidable visual impairment in the community.[4, 5]  
28  
29  
30  
31  
32  
33  
34  
35

36 Andhra Pradesh is one of the largest states in India with an estimated population of 84  
37  
38 million in 2011.[6] It is administratively divided into twenty three districts which are further  
39  
40 divided into sub-districts (mandals which are rural) and municipalities (urban).[6] The  
41  
42 literacy rate is around 68% and nearly one third of the population resides in urban areas as  
43  
44 per Census 2011.[6] Similar to other parts of the country, eye care services are provided by  
45  
46 several non-government organizations, private hospitals and clinics, especially in urban  
47  
48 areas and by government hospitals.[7] In rural areas, several non-government organizations  
49  
50 conduct outreach screening programmes to identify people with cataract who are then  
51  
52  
53  
54  
55  
56  
57  
58  
59  
60

1  
2  
3 transported to a base eye hospital where cataract surgery is performed at 'no cost' to the  
4  
5 people and expenses are reimbursed by national programme for control of blindness, India.  
6  
7

8  
9  
10 We recently conducted a large population-based cross sectional study among adults 40  
11  
12 years and older in three locations (one urban and two rural) in Andhra Pradesh and reported  
13  
14 an age and gender adjusted prevalence of visual impairment of 14.3% (95% CI: 13.5 - 15.0)  
15  
16 including a blindness prevalence of 5.5% (95% CI: 5.0 – 6.0).[8] Refractive errors were the  
17  
18 leading cause of visual impairment accounting for 47.6% followed by cataract (43.7%).[8] In  
19  
20 this paper, we report the reasons for poor uptake of eye care services among those who are  
21  
22 visually impaired due to cataract or refractive errors in this study cohort and suggest  
23  
24 strategies to address these barriers.  
25  
26  
27  
28  
29  
30

## 31 **METHODS**

### 32 **Ethics Approval**

33  
34  
35 The study protocol was reviewed and approved by Institutional Review Board (IRB) of  
36  
37 Hyderabad Eye Research Foundation, L V Prasad Eye Institute, Hyderabad, India. This study  
38  
39 adhered to the tenets of the Declaration of Helsinki. Verbal informed consent was obtained  
40  
41 from each subject after explaining the study procedures and before starting the eye  
42  
43 examination. The studies were carried out during 2011 and 2012.  
44  
45  
46  
47  
48  
49

### 50 **Data Collection**

51  
52 The sampling process and the study protocol are described in detail elsewhere.[8] In brief, a  
53  
54 two stage cluster random sampling was used to select 7800 subjects from 156 study clusters  
55  
56  
57

1  
2  
3 across three districts, Krishna (urban area), Khammam (rural) and Warangal (rural) in  
4  
5 Andhra Pradesh. In each randomly selected cluster, the study teams comprising of a vision  
6  
7 technician and a community eye health worker visited the selected households and  
8  
9 conducted eye examinations that included visual acuity assessment. Those with visual  
10  
11 impairment, defined as presenting visual acuity worse than 6/18 in the better eye were  
12  
13 identified. The investigators asked the question: 'why were services not sought despite  
14  
15 having visual impairment?' It was an open ended question and was asked in the local  
16  
17 language. The response given by the participants was matched with the responses that were  
18  
19 pre-listed on the data collection form and the response that was the closest was marked. If  
20  
21 a subject gave a response that was different to those listed, then it was fully documented in  
22  
23 the forms as 'others'. If the subject gave multiple responses, then a follow-up questioning  
24  
25 was asked to prioritize the response and the most important one was documented. The  
26  
27 responses used in the form were based on the questionnaire used in the previous studies in  
28  
29 India and were available in the local language. [3, 9, 10] To suggest strategies to increase  
30  
31 uptake of services, the responses were further categorized into two groups; a) Person  
32  
33 related barriers and b) Service related barriers. The proportion of visual impairment caused  
34  
35 due to cataract and refractive errors was considered as avoidable visual impairment in this  
36  
37 study.  
38  
39  
40  
41  
42  
43  
44  
45  
46  
47

48 Data analysis was done using STATA statistical software version 12.[11] Chi square tests  
49  
50 were conducted to assess the association between the barriers quoted by the individuals  
51  
52 and socio-demographic variables. The point prevalence estimate for prevalence of avoidable  
53  
54  
55  
56  
57  
58  
59  
60

1  
2  
3 blindness was calculated and reported along with 95% confidence intervals (CI). A p value of  
4  
5 0.05 (two-tailed) was considered as statistically significant for all the estimates.  
6  
7

## 8 9 10 **RESULTS**

11  
12 Among the 7800 enumerated from the three districts, 7378 (95%) individuals were available  
13  
14 for examination. Of those examined, 46.4% (n=3421) were male, 62% (n=4562) had no  
15  
16 education and 66.7% (n=4923) were from rural location. The mean age of those examined  
17  
18 (51.7 years; standard deviation 10.9 years) was similar to those not examined (52.8;  
19  
20 standard deviation 9.9 years) (p=0.05). Women were more likely to be examined compared  
21  
22 to men (95.6%versus 93.5%; p<0.01).[8]  
23  
24  
25  
26  
27

28  
29 The overall prevalence of avoidable visual impairment was 11.8% (95% CI: 11.0 – 12.5;  
30  
31 n=868). It was 9.5% (95% CI: 8.4 – 10.8) and 12.9% (95% CI: 12.0 – 13.8) in urban and rural  
32  
33 areas respectively. The most common reason quoted for not seeking eye care services were  
34  
35 'Old age need not felt' (29.6%; n=257) followed by 'unable to afford the cost of services'  
36  
37 (22.0%; n=191) and no one to accompany (14.4%) followed by aware of the problem, but  
38  
39 can manage (11.2%) (Table 1). 'No one to accompany' was quoted by 15.9% of the subjects  
40  
41 in the rural area compared to 10.3% in the urban area (p=0.04). 'Unaware of the problem'  
42  
43 and 'no time available / other priorities' was quoted more frequently by urban participants  
44  
45 compared to their rural peers (p<0.01). Other health reasons were significantly higher  
46  
47 among rural residents (p<0.01). The other reasons for not seeking eye care services were  
48  
49 similar between the groups (Table 1).  
50  
51  
52  
53  
54  
55  
56  
57  
58  
59  
60



Table 1: Reasons for not seeking eye care services (n=868)

| Responses                                          | Category | Urban (n=234) | Rural (n=634) | Total (n=868) | p values        |
|----------------------------------------------------|----------|---------------|---------------|---------------|-----------------|
|                                                    |          | %             | %             | %             |                 |
| Old age and need not felt                          | P        | 29.9          | 29.5          | 29.6          | 0.130           |
| Cannot afford                                      | S        | 20.5          | 22.6          | 22.0          | 0.520           |
| Aware of the problem, but can manage               | P        | 10.7          | 11.4          | 11.2          | 0.780           |
| No one to accompany                                | P        | 10.3          | 15.9          | 14.4          | <b>0.04</b>     |
| Unaware of the problem                             | P        | 9.0           | 0.6           | 2.9           | <b>&lt;0.01</b> |
| No time available / other priorities               | P        | 6.4           | 0.9           | 2.4           | <b>&lt;0.01</b> |
| Services not available or very far                 | S        | 4.7           | 3.3           | 3.7           | 0.340           |
| Waiting for cataract to mature                     | S        | 4.3           | 2.8           | 3.2           | 0.290           |
| Fear of losing eyesight / operation / consultation | P        | 2.6           | 5.5           | 4.7           | 0.070           |
| One eye adequate vision / need not felt            | P        | 1.3           | 3.2           | 2.6           | 0.130           |
| Other health reasons                               | P        | 0.4           | 4.3           | 3.2           | <b>&lt;0.01</b> |
|                                                    |          |               |               |               |                 |

*P=Personal related barriers; S=Service related barrier*

When the above quoted reasons for not seeking eye care services were categorized into person related and service related barriers, of 868 individuals who had avoidable visual impairment, 71.1% (n=617) individuals reported 'person related' barriers while 28.9% (n=251) individuals reported 'service related' barriers for uptake of services. Among the 'person related' barriers, the leading barrier was 'lack of perceived need' (61.1%;n=377) for reasons such as old age, good vision in other eye. This was followed by 'no one to accompany' (20.3%;n=125) and 'fear of surgery or consultation' (6.6%;n=41). Of the 251 individuals who had 'service related' barriers, lack of affordability was the major barrier (76.1%; n=191) followed by lack of accessibility (12.7%; n=32). Over 11% (n=28) of the

individuals were advised to wait for cataract surgery or waiting for cataract to mature (Figure 1). Other than the age group, the service related and person related barriers were similar between the gender, education, area of residence, level and causes of visual impairment (Table 2).

Table 2: Categories of reasons for not utilizing eye care services stratified by socio-demographic variables and causes of visual impairment

|                                             | Total in the group with avoidable Visual impairment | Service related barriers (n=251) |              | Person related barriers (n=617) |              | p#              |
|---------------------------------------------|-----------------------------------------------------|----------------------------------|--------------|---------------------------------|--------------|-----------------|
|                                             |                                                     | n                                | %*           | n                               | %*           |                 |
| <b>Age group (years)</b>                    |                                                     |                                  |              |                                 |              | <b>&lt;0.01</b> |
| 40 - 49                                     | 55                                                  | 25                               | 10.0         | 30                              | 4.9          |                 |
| 50 - 59                                     | 181                                                 | 69                               | 27.5         | 112                             | 18.2         |                 |
| 60 - 69                                     | 330                                                 | 97                               | 38.6         | 233                             | 37.8         |                 |
| 70 & above                                  | 302                                                 | 60                               | 23.9         | 242                             | 39.2         |                 |
| <b>Gender</b>                               |                                                     |                                  |              |                                 |              | <b>0.63</b>     |
| Male                                        | 381                                                 | 107                              | 42.6         | 275                             | 44.6         |                 |
| Female                                      | 487                                                 | 144                              | 57.4         | 343                             | 55.6         |                 |
| <b>Education</b>                            |                                                     |                                  |              |                                 |              | <b>0.58</b>     |
| No Education                                | 720                                                 | 211                              | 84.1         | 509                             | 82.5         |                 |
| Educated                                    | 148                                                 | 40                               | 15.9         | 108                             | 17.5         |                 |
| <b>Area of residence</b>                    |                                                     |                                  |              |                                 |              | <b>0.82</b>     |
| Urban                                       | 234                                                 | 69                               | 27.5         | 165                             | 26.7         |                 |
| Rural                                       | 634                                                 | 182                              | 72.5         | 452                             | 73.3         |                 |
| <b>Categories of visual impairment (VI)</b> |                                                     |                                  |              |                                 |              | <b>0.44</b>     |
| <6/18 - 6/60                                | 553                                                 | 155                              | 61.8         | 398                             | 64.5         |                 |
| <6/60                                       | 315                                                 | 96                               | 38.2         | 219                             | 35.5         |                 |
| <b>Cause of VI</b>                          |                                                     |                                  |              |                                 |              | <b>0.54</b>     |
| Cataract                                    | 401                                                 | 120                              | 47.8         | 281                             | 45.5         |                 |
| Refractive error                            | 467                                                 | 131                              | 52.2         | 336                             | 54.5         |                 |
| <b>Total</b>                                | <b>868</b>                                          | <b>251</b>                       | <b>100.0</b> | <b>617</b>                      | <b>100.0</b> |                 |

\* Column percentages presented

# p values comparing the service related and person related barriers

## DISCUSSION

We found an overwhelming predominance of 'person related' barriers compared to 'service related' barriers compared to previous studies suggestive of a clear change in trends in barriers over time.[4, 9, 10, 13-15] Earlier studies that were conducted about two decades ago, revealed 'service related' barriers such as availability, accessibility, and affordability in sharp contrast to 'person related' barriers found in this study. [4, 9, 10, 13-15] In 1995, Gupta and colleagues reported distance as the leading barrier for uptake of services followed by economic and other reasons whereas accessibility was not a major barrier in the current study.[15]

In the last few decades, the availability of services has increased significantly due to efforts of several non-government agencies and the national programme for prevention of blindness. Despite this, lack of affordability continues to remain a concern and still is a leading barrier. Recent studies from Andhra Pradesh also reported economic reasons one of the leading barriers for uptake of services.[5, 12] Affordability was a leading barrier (41%), similar to that found in Tamil Nadu [16] (78.2%) and another study from an urban area Andhra Pradesh.[9] However in the rural component of this study, it was not an important barrier.[10] Though some services are provided at no cost, the indirect expenses such as lost wages, travel and other incidental expenses may be posing an economic hurdle for uptake of services.[16, 17] The service delivery programmes need to consider ways to address the issues related to 'indirect costs' by providing transport facilities.

1  
2  
3 Lack of escort was quoted more commonly in Karnataka (21.6%) and Tamil Nadu (58.2%)  
4  
5 compared to 14.4% in the present study. [4, 16] However, 'waiting or was told to wait for  
6  
7 cataract surgery' was the leading reasons in the Karnataka study whereas it was reported  
8  
9 only by 3% of the respondents in our study.[4] These differences are indicative of the  
10  
11 changing trends in barriers for uptake of services over time. Similarly, the 'fear of surgery or  
12  
13 visual outcome after surgery' was more commonly reported from Tamil Nadu [17] and  
14  
15 Karnataka[4], compared to less than 5% of the participants in present study, again  
16  
17 suggestive of a changing trend.  
18  
19  
20  
21  
22  
23

24 The reasons such as fear of surgery, waiting or was told to wait for cataract to mature for  
25  
26 surgery are reminiscent of the days when ICCE (Intra capsular cataract extraction) was the  
27  
28 commonly performed procedure in the camp settings. In fact population-based studies that  
29  
30 were conducted over a decade ago in several parts of India revealed poor outcomes after  
31  
32 cataract surgery.[18, 19] However technological advances and increase in availability of  
33  
34 cataract surgical services support by National Programme for Control of Blindness (NPCB)  
35  
36 are resulting in better outcomes as evidenced by recent publications.[20, 21] However,  
37  
38 efforts are needed to pass this information on to the communities using effective  
39  
40 information, education and communication tools so that these barriers are addressed.  
41  
42  
43 Similar is the case with those reporting about 'other commitments' that prevent them from  
44  
45 undergoing cataract surgery and 'old age' and 'need not felt'; there appears to be  
46  
47 perception in the community on the need for long period of rest after cataract surgery that  
48  
49 will keep them away from active work engagements a considerable periods of time. The  
50  
51  
52  
53  
54  
55  
56  
57  
58  
59  
60

1  
2  
3 quick visual rehabilitation that is now possible with better surgical techniques at a low cost  
4  
5 even in small towns in India should be propagated more actively.  
6  
7

8  
9  
10 Availability was reported by less than 5% of those with avoidable visual impairment in both  
11  
12 urban and rural areas in the present study suggesting increased availability of services. 'Old  
13  
14 age and need not felt' was reported by more nearly 30% of the respondents which relates to  
15  
16 individual attitudes. A significantly higher proportion of rural residents reported 'no one to  
17  
18 accompany' compared to their urban counterparts and overall it accounted for nearly 15  
19  
20 percent of the responses. This could be attributed to availability of services at much closer  
21  
22 distance or better conveyance in urban locations compared to rural locations.  
23  
24  
25

26  
27  
28  
29 The individuals who are aware of their visual impairment but do not perceive the need for  
30  
31 consultations owing to several reasons which are more challenging for service providers to  
32  
33 deal with as it is related to attitude. This finding was also reported in earlier studies in  
34  
35 different parts of India.[3, 10] Only effective IEC methods focused on relative ease and  
36  
37 safety of cataract surgery that can be undertaken now compared to the strenuous planning  
38  
39 and efforts of yester years may induce a proportion of these people to utilize the services.  
40  
41  
42 The same holds true for those who don't perceive any eye problem despite having visual  
43  
44 impairment.  
45  
46  
47  
48  
49

50 Our study is not free from limitations. As the participants were aware of the affiliation of the  
51  
52 study teams, the responses may have been biased (courtesy bias). Moreover, the earlier  
53  
54 studies were focused on cataract compared to avoidable visual impairment in our study,  
55  
56  
57

1  
2  
3 though we found no difference in barriers with the avoidable causes of visual impairment.

4  
5 Our data present the pointers that can help service providers plan strategies to address  
6  
7 them but by no means provide in-depth analysis on health seeking behaviors.  
8  
9

10  
11  
12 In conclusion, as the barriers trend more towards 'person related' phenomenon such as  
13  
14 person's attitude and 'felt need' to improve vision, newer and much intensive awareness  
15  
16 campaigns are needed to bring about an attitudinal / behavioral change among individuals  
17  
18 to improve the uptake of services. Only such focused and innovative approaches can  
19  
20 improve uptake of services through which the goal of eliminating avoidable visual  
21  
22 impairment can be achieved.[22-24]  
23  
24  
25  
26  
27  
28

### 29 **FUNDING SUPPORT AND CONTRIBUTORSHIP STATEMENT**

30  
31 The financial support for this study was provided by Hyderabad Eye Research Foundation,  
32  
33 India. SM conceived the idea, designed and conducted the study and wrote the manuscript.  
34  
35 KS assisted in data collection and supervised the field activities. RCK and GNR reviewed the  
36  
37 earlier version of the manuscripts and provide the intellectual inputs.  
38  
39  
40  
41  
42

### 43 **DATA SHARING STATEMENT**

44  
45 No additional data available  
46  
47  
48  
49

### 50 **ACKNOWLEDGEMENTS**

51  
52 Authors thank Saggam Narsaiah, K Eswara Rao, Ch. Rajesh, Susheel Kumar Dagde, N. Raja  
53  
54 Shekar Reddy, S. Narahari, Byagari Raghavendra and Dasari Raghuswamy for their assistance  
55  
56  
57  
58  
59  
60

1  
2  
3 in field work and data collection. LVPEI acknowledges the volunteers for their participation  
4  
5 the study. Dr.Sreedevi Yadavalli is acknowledged for her language inputs on earlier versions  
6  
7 of the manuscript. Authors are thankful to Dr.Usha Raman (University of Hyderabad) and  
8  
9 Prof. Jill Keeffe for their comments on the earlier version of this manuscript.  
10  
11  
12  
13

14  
15 **Financial Support:** This study was funded by the Hyderabad Eye Research Foundation, India.  
16

17 **Competing Interests:** None  
18  
19  
20  
21  
22  
23

## 24 25 REFERENCES

- 26  
27 1. Pascolini D, Mariotti SP. Global estimates of visual impairment: 2010. Br J Ophthalmol  
28  
29 2012;**96**(5):614-8 doi: bjophthalmol-2011-300539 [pii] 10.1136/bjophthalmol-2011-  
30  
31 300539[published Online First: Epub Date] |.  
32  
33  
34  
35 2. Lansingh VC, Carter MJ, Martens M. Global cost-effectiveness of cataract surgery.  
36  
37 Ophthalmology 2007;**114**(9):1670-8 doi: S0161-6420(06)01660-5  
38  
39 [pii]10.1016/j.ophtha.2006.12.013[published Online First: Epub Date] |.  
40  
41  
42  
43 3. Marmamula S, Keeffe JE, Raman U, Rao GN. Population-based cross-sectional study of  
44  
45 barriers to utilisation of refraction services in South India: Rapid Assessment of  
46  
47 Refractive Errors (RARE) Study. BMJ open 2011;**1**(1):e000172 doi: 10.1136/bmjopen-  
48  
49 2011-000172.  
50  
51  
52  
53 4. Vaidyanathan K, Limburg H, Foster A, Pandey RM. Changing trends in barriers to cataract  
54  
55 surgery in India. Bulletin of the World Health Organization 1999;**77**(2):104-9  
56  
57  
58  
59  
60

- 1  
2  
3 5. Finger RP, Ali M, Earnest J, Nirmalan PK. Cataract surgery in Andhra Pradesh state, India:  
4  
5 an investigation into uptake following outreach screening camps. *Ophthalmic*  
6  
7 *Epidemiol* 2007;**14**(6):327-32 doi: 788999406.  
8  
9
- 10  
11 6. Census 2011. Registrar General and Census Commissioner, Census of India 2011. In:  
12  
13 Ministry of Home Affairs, Government of India, eds. New Delhi, 2011.  
14
- 15  
16 7. Thomas R, Paul P, Rao GN, Muliylil JP, Mathai A. Present status of eye care in India. *Surv*  
17  
18 *Ophthalmol* 2005;**50**(1):85-101  
19
- 20  
21 8. Marmamula S, Narsaiah S, Shekhar K, Khanna RC, Rao GN. Visual Impairment in the South  
22  
23 Indian State of Andhra Pradesh: Andhra Pradesh - Rapid Assessment of Visual  
24  
25 Impairment (AP-RAVI) Project. *PLoS One* 2013;**8**(7):e70120 doi:  
26  
27 10.1371/journal.pone.0070120[published Online First: Epub Date] | .  
28  
29
- 30  
31 9. Dandona R, Dandona L, Naduvilath TJ, McCarty CA, Rao GN. Utilisation of eyecare services  
32  
33 in an urban population in southern India: the Andhra Pradesh eye disease study. *Br J*  
34  
35 *Ophthalmol* 2000;**84**(1):22-7  
36  
37
- 38  
39 10. Kovai V, Krishnaiah S, Shamanna BR, Thomas R, Rao GN. Barriers to accessing eye care  
40  
41 services among visually impaired populations in rural Andhra Pradesh, South India.  
42  
43 *Indian J Ophthalmol* 2007;**55**(5):365-71  
44
- 45  
46 11. StataCorp. Stata Statistical Software: Release 12. College Station, TX: StataCorp LP.,  
47  
48 2011.  
49
- 50  
51 12. Marmamula S, Narsaiah S, Shekhar K, Khanna RC. Visual impairment among weaving  
52  
53 communities in Prakasam district in South India. *PLoS One* 2013;**8**(2):e55924 doi:  
54  
55 10.1371/journal.pone.0055924 .  
56  
57



- 1  
2  
3 13. Brilliant GE, Lepkowski JM, Zurita B, Thulasiraj RD. Social determinants of cataract  
4  
5 surgery utilization in south India. The Operations Research Group. Archives of  
6  
7 ophthalmology 1991;**109**(4):584-9  
8  
9
- 10 14. Finger RP. Cataracts in India: current situation, access, and barriers to services over time.  
11  
12 Ophthalmic Epidemiol 2007;**14**(3):112-8 doi: 10.1080/09286580601114967.  
13  
14
- 15 15. Gupta SK, Murthy GV. Where do persons with blindness caused by cataracts in rural  
16  
17 areas of India seek treatment and why? Archives of ophthalmology  
18  
19 1995;**113**(10):1337-40  
20  
21
- 22 16. Nirmalan PK, Katz J, Robin AL, et al. Utilisation of eye care services in rural south India:  
23  
24 the Aravind Comprehensive Eye Survey. Br J Ophthalmol 2004;**88**(10):1237-41  
25  
26
- 27 17. Fletcher AE, Donoghue M, Devavaram J, et al. Low uptake of eye services in rural India: a  
28  
29 challenge for programs of blindness prevention. Archives of ophthalmology  
30  
31 1999;**117**(10):1393-9  
32  
33
- 34 18. Anand R, Gupta A, Ram J, Singh U, Kumar R. Visual outcome following cataract surgery in  
35  
36 rural punjab. Indian J Ophthalmol 2000;**48**(2):153-8  
37  
38
- 39 19. Dandona L, Dandona R, Anand R, Srinivas M, Rajashekar V. Outcome and number of  
40  
41 cataract surgeries in India: policy issues for blindness control. Clin Experiment  
42  
43 Ophthalmol 2003;**31**(1):23-31 doi: 595  
44  
45
- 46 20. Khanna RC, Marmamula S, Krishnaiah S, Giridhar P, Chakrabarti S, Rao GN. Changing  
47  
48 trends in the prevalence of blindness and visual impairment in a rural district of  
49  
50 India: Systematic observations over a decade. Indian J Ophthalmol 2012;**60**(5):492-7  
51  
52 doi: IndianJOphthalmol\_2012\_60\_5\_492\_100560 [pii] 10.4103/0301-4738.100560  
53  
54  
55  
56  
57  
58  
59  
60

- 1  
2  
3 21. Khanna RC, Pallerla SR, Eeda SS, et al. Population based outcomes of cataract surgery in  
4  
5 three tribal areas of Andhra Pradesh, India: risk factors for poor outcomes. PLoS One  
6  
7 2012;**7**(5):e35701 doi: 10.1371/journal.pone.0035701 PONE-D-11-22424.  
8  
9  
10  
11 22. Khanna R, Raman U, Rao GN. Blindness and poverty in India: the way forward. Clinical &  
12  
13 experimental optometry : journal of the Australian Optometrical Association  
14  
15 2007;**90**(6):406-14 doi: CXO199 [pii] 10.1111/j.1444-0938.2007.00199.x.  
16  
17  
18  
19 23. Rao GN. An infrastructure model for the implementation of VISION 2020: The Right to  
20  
21 Sight. Can J Ophthalmol 2004;**39**:589–94.  
22  
23  
24 24. Rao GN, Khanna RC, Athota SM, Rajshekar V, Rani PK. Integrated model of primary and  
25  
26 secondary eye care for underserved rural areas: the L V Prasad Eye Institute  
27  
28 experience. Indian J Ophthalmol 2012;**60**(5):396-400.  
29  
30  
31  
32  
33  
34  
35  
36  
37  
38  
39

40 Figure 1: Flow chart showing the classification of reasons for not seeking eye care services  
41  
42 among those with avoidable visual impairment  
43  
44  
45  
46  
47  
48  
49  
50  
51  
52  
53  
54  
55  
56  
57  
58  
59  
60

1  
2  
3  
4  
5  
6  
7  
8  
9  
10  
11  
12  
13  
14  
15  
16  
17  
18  
19  
20  
21  
22  
23  
24  
25  
26  
27  
28  
29  
30  
31  
32  
33  
34  
35  
36  
37  
38  
39  
40  
41  
42  
43  
44  
45  
46  
47  
48  
49  
50  
51  
52  
53  
54  
55  
56  
57  
58  
59  
60

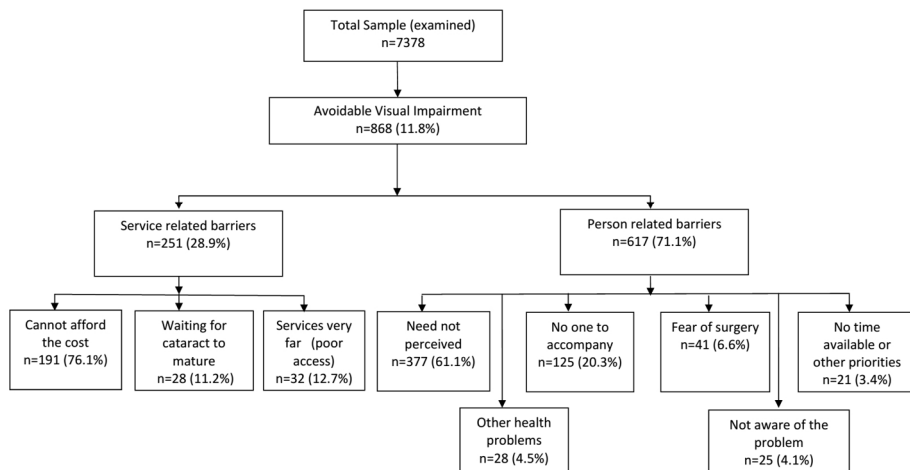

630x309mm (72 x 72 DPI)

er review only

STROBE 2007 (v4) Statement—Checklist of items that should be included in reports of *cross-sectional studies*

| Section/Topic             | Item # | Recommendation                                                                                                                                                                       | Reported on page # |
|---------------------------|--------|--------------------------------------------------------------------------------------------------------------------------------------------------------------------------------------|--------------------|
| Title and abstract        | 1      | (a) Indicate the study’s design with a commonly used term in the title or the abstract                                                                                               | 2                  |
|                           |        | (b) Provide in the abstract an informative and balanced summary of what was done and what was found                                                                                  | 2                  |
| <b>Introduction</b>       |        |                                                                                                                                                                                      |                    |
| Background/rationale      | 2      | Explain the scientific background and rationale for the investigation being reported                                                                                                 | 3                  |
| Objectives                | 3      | State specific objectives, including any prespecified hypotheses                                                                                                                     | 4                  |
| <b>Methods</b>            |        |                                                                                                                                                                                      |                    |
| Study design              | 4      | Present key elements of study design early in the paper                                                                                                                              | 4,5                |
| Setting                   | 5      | Describe the setting, locations, and relevant dates, including periods of recruitment, exposure, follow-up, and data collection                                                      | 4,5                |
| Participants              | 6      | (a) Give the eligibility criteria, and the sources and methods of selection of participants                                                                                          | 4,5                |
| Variables                 | 7      | Clearly define all outcomes, exposures, predictors, potential confounders, and effect modifiers. Give diagnostic criteria, if applicable                                             | 4,5                |
| Data sources/ measurement | 8*     | For each variable of interest, give sources of data and details of methods of assessment (measurement). Describe comparability of assessment methods if there is more than one group |                    |
| Bias                      | 9      | Describe any efforts to address potential sources of bias                                                                                                                            |                    |
| Study size                | 10     | Explain how the study size was arrived at                                                                                                                                            | 5                  |
| Quantitative variables    | 11     | Explain how quantitative variables were handled in the analyses. If applicable, describe which groupings were chosen and why                                                         |                    |
| Statistical methods       | 12     | (a) Describe all statistical methods, including those used to control for confounding                                                                                                | 5                  |
|                           |        | (b) Describe any methods used to examine subgroups and interactions                                                                                                                  |                    |
|                           |        | (c) Explain how missing data were addressed                                                                                                                                          |                    |
|                           |        | (d) If applicable, describe analytical methods taking account of sampling strategy                                                                                                   |                    |
|                           |        | (e) Describe any sensitivity analyses                                                                                                                                                |                    |
| <b>Results</b>            |        |                                                                                                                                                                                      |                    |

|                          |     |                                                                                                                                                                                                                                                                                                                                                                                                               |       |
|--------------------------|-----|---------------------------------------------------------------------------------------------------------------------------------------------------------------------------------------------------------------------------------------------------------------------------------------------------------------------------------------------------------------------------------------------------------------|-------|
| Participants             | 13* | (a) Report numbers of individuals at each stage of study—eg numbers potentially eligible, examined for eligibility, confirmed eligible, included in the study, completing follow-up, and analysed<br>(b) Give reasons for non-participation at each stage<br>(c) Consider use of a flow diagram                                                                                                               | 6     |
| Descriptive data         | 14* | (a) Give characteristics of study participants (eg demographic, clinical, social) and information on exposures and potential confounders<br>(b) Indicate number of participants with missing data for each variable of interest                                                                                                                                                                               | 6     |
| Outcome data             | 15* | Report numbers of outcome events or summary measures                                                                                                                                                                                                                                                                                                                                                          |       |
| Main results             | 16  | (a) Give unadjusted estimates and, if applicable, confounder-adjusted estimates and their precision (eg, 95% confidence interval). Make clear which confounders were adjusted for and why they were included<br>(b) Report category boundaries when continuous variables were categorized<br>(c) If relevant, consider translating estimates of relative risk into absolute risk for a meaningful time period | 6     |
| Other analyses           | 17  | Report other analyses done—eg analyses of subgroups and interactions, and sensitivity analyses                                                                                                                                                                                                                                                                                                                |       |
| <b>Discussion</b>        |     |                                                                                                                                                                                                                                                                                                                                                                                                               |       |
| Key results              | 18  | Summarise key results with reference to study objectives                                                                                                                                                                                                                                                                                                                                                      | 9,10  |
| Limitations              | 19  | Discuss limitations of the study, taking into account sources of potential bias or imprecision. Discuss both direction and magnitude of any potential bias                                                                                                                                                                                                                                                    | 11,12 |
| Interpretation           | 20  | Give a cautious overall interpretation of results considering objectives, limitations, multiplicity of analyses, results from similar studies, and other relevant evidence                                                                                                                                                                                                                                    | 11,12 |
| Generalisability         | 21  | Discuss the generalisability (external validity) of the study results                                                                                                                                                                                                                                                                                                                                         | 12    |
| <b>Other information</b> |     |                                                                                                                                                                                                                                                                                                                                                                                                               |       |
| Funding                  | 22  | Give the source of funding and the role of the funders for the present study and, if applicable, for the original study on which the present article is based                                                                                                                                                                                                                                                 | 12    |

\*Give information separately for cases and controls in case-control studies and, if applicable, for exposed and unexposed groups in cohort and cross-sectional studies.

**Note:** An Explanation and Elaboration article discusses each checklist item and gives methodological background and published examples of transparent reporting. The STROBE checklist is best used in conjunction with this article (freely available on the Web sites of PLoS Medicine at <http://www.plosmedicine.org/>, Annals of Internal Medicine at <http://www.annals.org/>, and Epidemiology at <http://www.epidem.com/>). Information on the STROBE Initiative is available at [www.strobe-statement.org](http://www.strobe-statement.org).

# BMJ Open

## A population based Cross sectional Study of Barriers to Uptake of Eye Care Services in South India: The Rapid Assessment of Visual Impairment (RAVI) Project

|                                 |                                                                                                                                                                                                                                                                                                                                                                                              |
|---------------------------------|----------------------------------------------------------------------------------------------------------------------------------------------------------------------------------------------------------------------------------------------------------------------------------------------------------------------------------------------------------------------------------------------|
| Journal:                        | <i>BMJ Open</i>                                                                                                                                                                                                                                                                                                                                                                              |
| Manuscript ID:                  | bmjopen-2014-005125.R1                                                                                                                                                                                                                                                                                                                                                                       |
| Article Type:                   | Research                                                                                                                                                                                                                                                                                                                                                                                     |
| Date Submitted by the Author:   | 23-Apr-2014                                                                                                                                                                                                                                                                                                                                                                                  |
| Complete List of Authors:       | Marmamula, Srinivas; L V Prasad Eye Institute, Allen Foster Community Eye Health Research Centre, ICARE<br>Khanna, Rohit; L.V.prasad eye institute,<br>Konegari, Shekhar; L V Prasad Eye Institute, Allen Foster Community Eye Health Research Centre, ICARE<br>Rao, Gullapalli; LV Prasad Eye Institute; L V Prasad Eye Institute, Allen Foster Community Eye Health Research Centre, ICARE |
| <b>Primary Subject Heading</b>: | Ophthalmology                                                                                                                                                                                                                                                                                                                                                                                |
| Secondary Subject Heading:      | Epidemiology, Ophthalmology, Public health                                                                                                                                                                                                                                                                                                                                                   |
| Keywords:                       | PUBLIC HEALTH, Health policy < HEALTH SERVICES ADMINISTRATION & MANAGEMENT, EPIDEMIOLOGY, Quality in health care < HEALTH SERVICES ADMINISTRATION & MANAGEMENT                                                                                                                                                                                                                               |
|                                 |                                                                                                                                                                                                                                                                                                                                                                                              |

SCHOLARONE™  
Manuscripts

Only

**A population based Cross sectional Study of Barriers to Uptake of Eye Care Services in  
South India: The Rapid Assessment of Visual Impairment (RAVI) Project**

Srinivas Marmamula<sup>1,2</sup>, Rohit C. Khanna<sup>1</sup>, Konegari Shekhar<sup>1</sup>

Gullapalli N Rao<sup>1,2</sup>

<sup>1</sup> Allen Foster Community Eye Health Research Centre, Gullapalli Pratibha Rao International  
Centre for Advancement of Rural Eye care, L V Prasad Eye Institute, Hyderabad, India

<sup>2</sup> Bausch & Lomb School of Optometry, L V Prasad Eye Institute, Hyderabad, India

**Running Head:** Barriers to uptake of eye care services in Andhra Pradesh, India

**Key words:** Visual Impairment; Cataract; Refractive errors; Barriers; Rapid assessment

**Article Type:** Original article

**Address for correspondence:**

Srinivas Marmamula, M.Sc, PhD

Allen Foster Community Eye Health Research Centre

ICARE, L V Prasad Eye Institute,

Road # 2, Banjara Hills, Hyderabad, India- 500034

E-mail: sriptom@lvpei.org

**Manuscript word count:** 2364 words (excluding title page, abstract, references, figure legends and tables)

**ABSTRACT**

**Objective:** To assess the barriers to uptake of eye care services among those with avoidable impairment in the population aged  $\geq 40$  years in South India state of Andhra Pradesh.

**Design:** Cross-sectional study

**Setting:** Community Setting

**Participants:** Of 7800 subjects were enumerated from an urban and two rural locations using a two stage cluster random sampling methodology, 7378 (95%) were examined. Eye examinations were conducted using a rapid assessment protocol. Visual Impairment (VI) was defined as presenting visual acuity  $< 6/18$  in the better eye. For the purpose of this study, VI caused due to cataract or uncorrected refractive error was considered avoidable VI. A validated questionnaire was used to collect information on barriers for uptake of services among those who had avoidable VI.

**Primary Outcome:** Barriers to uptake of services among those with avoidable VI

**Results:** The prevalence of avoidable VI was 11.8% (95%:11.0–12.5; n=868). Among these, 71.1% (n=617) individuals reported 'person related' barriers while 28.9% (n=251) individuals reported 'service related' barriers to uptake of services. Among the 'person related' barriers, the leading barrier was 'lack of perceived need' (61.1%; n=377) for reasons such as old age, good vision in other eye. This was followed by 'no one to accompany' (20.3%; n=125). Of the 251 individuals who had 'service related' barriers, lack of affordability was the major barrier (76.1%; n=191) followed by lack of accessibility (12.7%; n=32). Over 11% (n=28) of the individuals were advised to wait for cataract surgery.

**Conclusions:** Person related barriers are more common than service related barriers in Andhra Pradesh. As the barriers trend more towards 'person related' phenomenon such as



1  
2  
3 person's attitude and 'felt need' to improve vision, newer and much intensive awareness  
4  
5 campaigns are needed to bring about an attitudinal / behavioral change among individuals  
6  
7  
8 to improve the uptake of services.  
9

## 10 11 12 13 14 **ARTICLE SUMMARY**

### 15 16 **Article focus**

- 17  
18 – Avoidable visual impairment is common in south Indian state of Andhra Pradesh.
- 19  
20 – Despite availability of services, several barriers limit the uptake of eye care services
- 21  
22 – Understanding and addressing the barriers is essential to tackle the challenge of  
23  
24 visual impairment  
25  
26  
27

### 28 29 **Key messages**

- 30  
31 – 'Person related' barriers are more common than 'service related' barriers in our  
32  
33 study population
- 34  
35 – Compared to earlier studies, there is trend towards 'person related' barriers  
36  
37 compared to 'service related' barriers
- 38  
39 – Lack of 'perceived need' and affordability are the leading barriers that prevent the  
40  
41 uptake of services in the study region  
42  
43  
44

### 45 46 **Strengths and limitations**

- 47  
48 – Large representative sample from three districts, a good response rate and sound  
49  
50 methodology are the strengths of the study
- 51  
52 – The division of barriers into 'person related' and 'service related' is arbitrary and  
53  
54 subject to discussion.  
55  
56  
57

1  
2  
3 With over 285 million visually impaired people worldwide, visual impairment is a major  
4  
5 global public health challenge.[1] Over 80% of the blindness is due to cataract and  
6  
7 uncorrected refractive errors, both of which have cost-effective solutions.[1, 2] While  
8  
9 technological advances have rendered cataract surgery safe, resulting in excellent  
10  
11 outcomes, this technology needs to be accessible to people in remote rural areas in  
12  
13 developing nations where visual impairment is more prevalent.[1] Making services available  
14  
15 is only a part of the larger solution to the global problem of visual impairment. Even in  
16  
17 places where services are available and accessible,[3] the uptake of services is determined  
18  
19 by several factors or barriers that must be addressed if we are to improve the uptake of  
20  
21 services and thereby reduce the prevalence of visual impairment. Research has shown that  
22  
23 the barriers to uptake of services tend to change over time due to several factors. [4, 5]  
24  
25 Hence research on changing trends is necessary to guide service delivery programmes for  
26  
27 planning strategies to address avoidable visual impairment in the community.  
28  
29  
30  
31  
32  
33  
34  
35

36 Andhra Pradesh is one of the largest states in India with an estimated population of 84  
37  
38 million in 2011.[6] It is administratively divided into twenty three districts which are further  
39  
40 divided into sub-districts (mandals which are rural) and municipalities (urban).[6] The  
41  
42 literacy rate is around 68% and nearly one third of the population resides in urban areas as  
43  
44 per Census 2011.[6] Similar to other parts of the country, eye care services are provided by  
45  
46 several non-government organizations, private hospitals and clinics, especially in urban  
47  
48 areas and by government hospitals.[7] In rural areas, several non-government organizations  
49  
50 conduct outreach screening programmes to identify people with cataract who are then  
51  
52  
53  
54  
55  
56  
57  
58  
59  
60

1  
2  
3 transported to a base eye hospital where cataract surgery is performed at 'no cost' to the  
4  
5 people and expenses are reimbursed by national programme for control of blindness, India.  
6  
7

8  
9  
10 We recently conducted a large population-based cross sectional study among adults 40  
11  
12 years and older in three locations (one urban and two rural) in Andhra Pradesh and reported  
13  
14 an age and gender adjusted prevalence of visual impairment of 14.3% (95% CI: 13.5 - 15.0)  
15  
16 including a blindness prevalence of 5.5% (95% CI: 5.0 – 6.0).[8] Refractive errors were the  
17  
18 leading cause of visual impairment accounting for 47.6% followed by cataract (43.7%).[8] In  
19  
20 this paper, we report the reasons for poor uptake of eye care services among those who are  
21  
22 visually impaired due to cataract or refractive errors in this study cohort and suggest  
23  
24 strategies to address these barriers.  
25  
26  
27  
28  
29  
30

## 31 **METHODS**

### 32 **Ethics Approval**

33  
34 The study protocol was reviewed and approved by Institutional Review Board (IRB) of  
35  
36 Hyderabad Eye Research Foundation, L V Prasad Eye Institute, Hyderabad, India. This study  
37  
38 adhered to the tenets of the Declaration of Helsinki. Verbal informed consent was obtained  
39  
40 from each subject after explaining the study procedures and before starting the eye  
41  
42 examination. The studies were carried out during 2011 and 2012.  
43  
44  
45  
46  
47  
48  
49

### 50 **Data Collection**

51  
52 The sampling process and the study protocol are described in detail elsewhere.[8] In brief, a  
53  
54 two stage cluster random sampling was used to select 7800 subjects from 156 study clusters  
55  
56  
57

1  
2  
3 across three districts, Krishna (urban area), Khammam (rural) and Warangal (rural) in  
4  
5 Andhra Pradesh. In each randomly selected cluster, the study teams comprising of a vision  
6  
7 technician and a community eye health worker visited the selected households and  
8  
9 conducted eye examinations that included visual acuity assessment. Those with visual  
10  
11 impairment, defined as presenting visual acuity worse than 6/18 in the better eye were  
12  
13 identified. The investigators asked the question: 'why were services not sought despite  
14  
15 having visual impairment?' It was an open ended question and was asked in the local  
16  
17 language. The response given by the participants was matched with the responses that were  
18  
19 pre-listed on the data collection form and the response that was the closest was marked. If  
20  
21 a subject gave a response that was different to those listed, then it was fully documented in  
22  
23 the forms as 'others'. If the subject gave multiple responses, then a follow-up questioning  
24  
25 was asked to prioritize the response and the most important one was documented. The  
26  
27 responses used in the form were based on the questionnaire used in the previous studies in  
28  
29 India and were available in the local language. [3, 9, 10] To suggest strategies to increase  
30  
31 uptake of services, the responses were further categorized into two groups; a) Person  
32  
33 related barriers and b) Service related barriers. The proportion of visual impairment caused  
34  
35 due to cataract and refractive errors was considered as avoidable visual impairment in this  
36  
37 study.  
38  
39  
40  
41  
42  
43  
44  
45  
46  
47

48 Data analysis was done using STATA statistical software version 12.[11] Chi square tests  
49  
50 were conducted to assess the association between the barriers quoted by the individuals  
51  
52 and socio-demographic variables. The point prevalence estimate for prevalence of avoidable  
53  
54  
55  
56  
57  
58  
59  
60

1  
2  
3 blindness was calculated and reported along with 95% confidence intervals (CI). A p value of  
4  
5 0.05 (two-tailed) was considered as statistically significant for all the estimates.  
6  
7

## 8 9 10 **RESULTS**

11  
12 Among the 7800 enumerated from the three districts, 7378 (95%) individuals were available  
13  
14 for examination. Of those examined, 46.4% (n=3421) were male, 62% (n=4562) had no  
15  
16 education and 66.7% (n=4923) were from rural location. The mean age of those examined  
17  
18 was 51.7 years (standard deviation 10.9 years) compared to 52.8 years (standard deviation  
19  
20 9.9 years) of those not examined. The mean difference in age among those examined and  
21  
22 not examined was of borderline statistical significance (p=0.05). Women were more likely to  
23  
24 be examined compared to men (95.6% versus 93.5%; p<0.01).[8]  
25  
26  
27  
28  
29

30  
31 The overall prevalence of avoidable visual impairment was 11.8% (95% CI: 11.0 – 12.5;  
32  
33 n=868). It was 9.5% (95% CI: 8.4 – 10.8) and 12.9% (95% CI: 12.0 – 13.8) in urban and rural  
34  
35 areas respectively. The most common reason quoted for not seeking eye care services were  
36  
37 ‘Old age need not felt’ (29.6%; n=257) followed by ‘unable to afford the cost of services’  
38  
39 (22.0%; n=191) and no one to accompany (14.4%) followed by ‘aware of the problem, but  
40  
41 can manage’ (11.2%) (Table 1). ‘No one to accompany’ was quoted by 15.9% of the subjects  
42  
43 in the rural area compared to 10.3% in the urban area (p=0.04). ‘Unaware of the problem’  
44  
45 and ‘no time available / other priorities’ was quoted more frequently by urban participants  
46  
47 compared to their rural peers (p<0.01). Other health reasons were significantly higher  
48  
49 among rural residents (p<0.01). The other reasons for not seeking eye care services were  
50  
51 similar between the groups (Table 1).  
52  
53  
54  
55  
56  
57  
58  
59  
60

Table 1: Reasons for not utilizing care services (n=868)

| Responses                                          | Category | Urban<br>(n=234) | Rural<br>(n=634) | Total<br>(n=868) | Statistical<br>significance |
|----------------------------------------------------|----------|------------------|------------------|------------------|-----------------------------|
|                                                    |          | n (%)            | n (%)            | n (%)            |                             |
| Old age and need not felt                          | P        | 70 (29.9)        | 187 (29.5)       | 257 (29.6)       | 0.13                        |
| Cannot afford                                      | S        | 48 (20.5)        | 143 (22.6)       | 191 (22.0)       | 0.52                        |
| No one to accompany                                | P        | 24 (10.3)        | 101 (15.9)       | 125 (14.4)       | <b>0.04</b>                 |
| Aware of the problem, but can manage               | P        | 25 (10.7)        | 72 (11.4)        | 97 (11.2)        | 0.78                        |
| Fear of losing eyesight / operation / Consultation | P        | 6 (2.6)          | 35 (5.5)         | 41 (4.7)         | 0.07                        |
| Services not available or very far                 | S        | 11 (4.7)         | 21 (3.3)         | 32 (3.7)         | 0.34                        |
| Waiting for cataract to mature                     | S        | 10 (4.3)         | 18 (2.8)         | 28 (3.2)         | 0.29                        |
| Other health reasons                               | P        | 1 (0.4)          | 27 (4.3)         | 28 (3.2)         | <b>&lt;0.01</b>             |
| Unaware of the problem                             | P        | 21 (9.0)         | 4 (0.6)          | 25 (2.9)         | <b>&lt;0.01</b>             |
| No time available / other priorities               | P        | 15 (6.4)         | 6 (0.9)          | 21 (2.9)         | <b>&lt;0.01</b>             |
| One eye adequate vision / need not felt            | P        | 3 (1.3)          | 20 (3.2)         | 23 (2.6)         | 0.13                        |
| <b>Total</b>                                       |          | <b>234 (100)</b> | <b>634 (100)</b> | <b>868 (100)</b> |                             |

P=Person related barrier; S=Service related barrier

When the above quoted reasons for not seeking eye care services were categorized into 'person related' and 'service related' barriers, of 868 individuals who had avoidable visual impairment, 71.1% (n=617) individuals reported 'person related' barriers while 28.9% (n=251) individuals reported 'service related' barriers for uptake of services. Among the 'person related' barriers, the leading barrier was 'lack of perceived need' (61.1%;n=377) for reasons such as old age, good vision in other eye. This was followed by 'no one to accompany' (20.3%;n=125) and 'fear of surgery or consultation' (6.6%;n=41).

Of the 251 individuals who had 'service related' barriers, lack of affordability was the major barrier (76.1%; n=191) followed by lack of accessibility (12.7%; n=32). Over 11% (n=28) of the individuals were advised by an eye care service provider to 'wait for cataract surgery' or 'waiting for cataract to mature' (Figure 1). Except for age groups, the service related and person related barriers were similar with respect to all other characteristics such as gender, education, area of residence, level and causes of visual impairment (Table 2).

Table 2: Categories of reasons for not utilizing eye care services stratified by socio-demographic variables and causes of visual impairment

|                                             | Total in the group with avoidable Visual impairment |     | Service related barriers (n=251) |     | Person related barriers (n=617) |  | p#              |
|---------------------------------------------|-----------------------------------------------------|-----|----------------------------------|-----|---------------------------------|--|-----------------|
|                                             | n                                                   | n   | %*                               | n   | %*                              |  |                 |
| <b>Age group (years)</b>                    |                                                     |     |                                  |     |                                 |  | <b>&lt;0.01</b> |
| 40 - 49                                     | 55                                                  | 25  | 10.0                             | 30  | 4.9                             |  |                 |
| 50 - 59                                     | 181                                                 | 69  | 27.5                             | 112 | 18.2                            |  |                 |
| 60 - 69                                     | 330                                                 | 97  | 38.6                             | 233 | 37.8                            |  |                 |
| 70 & above                                  | 302                                                 | 60  | 23.9                             | 242 | 39.2                            |  |                 |
| <b>Gender</b>                               |                                                     |     |                                  |     |                                 |  | <i>0.63</i>     |
| Male                                        | 381                                                 | 107 | 42.6                             | 275 | 44.6                            |  |                 |
| Female                                      | 487                                                 | 144 | 57.4                             | 343 | 55.6                            |  |                 |
| <b>Education</b>                            |                                                     |     |                                  |     |                                 |  | <i>0.58</i>     |
| No Education                                | 720                                                 | 211 | 84.1                             | 509 | 82.5                            |  |                 |
| Educated                                    | 148                                                 | 40  | 15.9                             | 108 | 17.5                            |  |                 |
| <b>Area of residence</b>                    |                                                     |     |                                  |     |                                 |  | <i>0.82</i>     |
| Urban                                       | 234                                                 | 69  | 27.5                             | 165 | 26.7                            |  |                 |
| Rural                                       | 634                                                 | 182 | 72.5                             | 452 | 73.3                            |  |                 |
| <b>Categories of visual impairment (VI)</b> |                                                     |     |                                  |     |                                 |  | <i>0.44</i>     |
| <6/18 - 6/60                                | 553                                                 | 155 | 61.8                             | 398 | 64.5                            |  |                 |
| <6/60                                       | 315                                                 | 96  | 38.2                             | 219 | 35.5                            |  |                 |
| <b>Cause of VI</b>                          |                                                     |     |                                  |     |                                 |  | <i>0.54</i>     |
| Cataract                                    | 401                                                 | 120 | 47.8                             | 281 | 45.5                            |  |                 |

|                  |            |            |       |            |       |  |
|------------------|------------|------------|-------|------------|-------|--|
| Refractive error | 467        | 131        | 52.2  | 336        | 54.5  |  |
| <b>Total</b>     | <b>868</b> | <b>251</b> | 100.0 | <b>617</b> | 100.0 |  |

\* Column percentages presented

# p values comparing the service related and person related barriers

## DISCUSSION

We found an overwhelming predominance of 'person related' barriers compared to 'service related' barriers compared to previous studies suggestive of a clear change in trends in barriers over time.[4, 9, 10, 12-14] Earlier studies that were conducted about two decades ago, revealed 'service related' barriers such as availability, accessibility, and affordability in sharp contrast to 'person related' barriers found in this study. [4, 9, 10, 12-14] In 1995, Gupta and colleagues reported distance as the leading barrier for uptake of services followed by economic and other reasons whereas accessibility was not a major barrier in the current study.[14]

In the last few decades, the availability of services has increased significantly due to efforts of several non-government agencies and the national programme for prevention of blindness. Despite this, lack of affordability continues to remain a concern and still is a leading barrier. Recent studies from Andhra Pradesh also reported economic reasons one of the leading barriers for uptake of services.[5, 15] Affordability was a leading barrier (41%), similar to that found in Tamil Nadu [16] (78.2%) and another study from an urban area Andhra Pradesh.[9] However in the rural component of this study, it was not an important barrier.[10] Though some services are provided at no cost, the indirect expenses such as lost wages, travel and other incidental expenses may be posing an economic hurdle for uptake



1  
2  
3 of services.[16, 17] The service delivery programmes need to consider ways to address the  
4  
5 issues related to 'indirect costs' by providing transport facilities.  
6  
7

8  
9  
10  
11  
12 Lack of escort was quoted more commonly in Karnataka (21.6%) and Tamil Nadu (58.2%)  
13 compared to 14.4% in the present study. [4, 16] However, 'waiting or was told to wait for  
14  
15 cataract surgery' was the leading reasons in the Karnataka study whereas it was reported  
16  
17 only by 3% of the respondents in our study.[4] These differences are indicative of the  
18  
19 changing trends in barriers for uptake of services over time. Similarly, the 'fear of surgery or  
20  
21 visual outcome after surgery' was more commonly reported from Tamil Nadu [17] and  
22  
23 Karnataka[4], compared to less than 5% of the participants in present study, again  
24  
25 suggestive of a changing trend.  
26  
27  
28  
29  
30  
31  
32

33  
34 The reasons such as fear of surgery, waiting or was told to wait for cataract to mature for  
35  
36 surgery are reminiscent of the days when ICCE (Intra capsular cataract extraction) was the  
37  
38 commonly performed procedure in the camp settings. In fact population-based studies that  
39  
40 were conducted over a decade ago in several parts of India revealed poor outcomes after  
41  
42 cataract surgery.[18, 19] However technological advances and increase in availability of  
43  
44 cataract surgical services support by National Programme for Control of Blindness (NPCB)  
45  
46 are resulting in better outcomes as evidenced by recent publications.[20, 21] However,  
47  
48 efforts are needed to pass this information on to the communities using effective  
49  
50 information, education and communication tools so that these barriers are addressed.  
51  
52  
53  
54 Similar is the case with those reporting about 'other commitments' that prevent them from  
55  
56  
57  
58  
59  
60

1  
2  
3 undergoing cataract surgery and 'old age' and 'need not felt'; there appears to be  
4  
5 perception in the community on the need for long period of rest after cataract surgery that  
6  
7 will keep them away from active work engagements a considerable periods of time. The  
8  
9 quick visual rehabilitation that is now possible with better surgical techniques at a low cost  
10  
11 even in small towns in India should be propagated more actively.  
12  
13

14  
15  
16  
17 Availability was reported by less than 5% of those with avoidable visual impairment in both  
18  
19 urban and rural areas in the present study suggesting increased availability of services. 'Old  
20  
21 age and need not felt' was reported by more nearly 30% of the respondents which relates to  
22  
23 individual attitudes. A significantly higher proportion of rural residents reported 'no one to  
24  
25 accompany' compared to their urban counterparts and overall it accounted for nearly 15  
26  
27 percent of the responses. This could be attributed to availability of services at much closer  
28  
29 distance or better conveyance in urban locations compared to rural locations.  
30  
31  
32

33  
34  
35  
36 The individuals who are aware of their visual impairment but do not perceive the need for  
37  
38 consultations owing to several reasons which are more challenging for service providers to  
39  
40 deal with as it is related to attitude. This finding was also reported in earlier studies in  
41  
42 different parts of India.[3, 10] Only effective IEC methods focused on relative ease and  
43  
44 safety of cataract surgery that can be undertaken now compared to the strenuous planning  
45  
46 and efforts of yester years may induce a proportion of these people to utilize the services.  
47  
48  
49 The same holds true for those who don't perceive any eye problem despite having visual  
50  
51  
52  
53  
54  
55  
56  
57  
58  
59  
60 impairment.

1  
2  
3 We did not find any difference in 'person related' and 'service related' barriers among those  
4  
5 with cataract and uncorrected refractive errors though they require a very different  
6  
7 intervention. This could be possible as the barriers question was asked to all those with  
8  
9 avoidable visual impairment and not specific to a cause. It is possible that a significant  
10  
11 proportion of people may not have known the cause of their visual impairment. It is also  
12  
13 possible that some of those who were visually impaired due to uncorrected refractive errors  
14  
15 felt that their visual impairment was due to cataract and not refractive errors and vice-  
16  
17 versa.  
18  
19  
20  
21  
22  
23

24 Our study is not free from limitations. As the participants were aware of the affiliation of the  
25  
26 study teams, the responses may have been biased (courtesy bias). Moreover, the earlier  
27  
28 studies were focused on cataract compared to avoidable visual impairment in our study,  
29  
30 though we found no difference in barriers with the avoidable causes of visual impairment.  
31  
32 Our data present the pointers that can help service providers plan strategies to address  
33  
34 them but by no means provide in-depth analysis on health seeking behaviors.  
35  
36  
37  
38  
39  
40

41 In conclusion, as the barriers trend more towards 'person related' phenomenon such as  
42  
43 person's attitude and 'felt need' to improve vision, newer and much intensive awareness  
44  
45 campaigns are needed to bring about an attitudinal / behavioral change among individuals  
46  
47 to improve the uptake of services. Only such focused and innovative approaches can  
48  
49 improve uptake of services through which the goal of eliminating avoidable visual  
50  
51 impairment can be achieved.[22-24]  
52  
53  
54  
55  
56  
57  
58  
59  
60

### **FUNDING SUPPORT AND CONTRIBUTORSHIP STATEMENT**

The financial support for this study was provided by Hyderabad Eye Research Foundation, India. SM conceived the idea, designed and conducted the study and wrote the manuscript. KS assisted in data collection and supervised the field activities. RCK and GNR reviewed the earlier version of the manuscripts and provide the intellectual inputs.

### **DATA SHARING STATEMENT**

No additional data available

### **ACKNOWLEDGEMENTS**

Authors thank S Narsaiah, K Eswara Rao, Ch. Rajesh, D Susheel Kumar, N Raja Shekar Reddy, S Narahari, B Raghavendra and D Raghuswamy for their assistance in field work and data collection. LVPEI acknowledges the volunteers for their participation the study. Dr.Sreedevi Yadavalli is acknowledged for her language inputs on earlier versions of the manuscript. Authors are thankful to Dr.Usha Raman (University of Hyderabad) and Prof. Jill Keeffe for their comments on the earlier versions of this manuscript.

**Financial Support:** This study was funded by the Hyderabad Eye Research Foundation, India.

**Competing Interests:** None

## REFERENCES

1. Pascolini D, Mariotti SP. Global estimates of visual impairment: 2010. *Br J Ophthalmol* 2012;**96**(5):614-8
2. Lansingh VC, Carter MJ, Martens M. Global cost-effectiveness of cataract surgery. *Ophthalmology* 2007;**114**(9):1670-8
3. Marmamula S, Keeffe JE, Raman U, et al. Population-based cross-sectional study of barriers to utilisation of refraction services in South India: Rapid Assessment of Refractive Errors (RARE) Study. *BMJ open* 2011;**1**(1):e000172
4. Vaidyanathan K, Limburg H, Foster A, et al. Changing trends in barriers to cataract surgery in India. *Bulletin of the World Health Organization* 1999;**77**(2):104-9
5. Finger RP, Ali M, Earnest J, et al. Cataract surgery in Andhra Pradesh state, India: an investigation into uptake following outreach screening camps. *Ophthalmic Epidemiol* 2007;**14**(6):327-32
6. Census 2011. Registrar General and Census Commissioner, Census of India 2011. In: Ministry of Home Affairs, Government of India, eds. New Delhi, 2011.
7. Thomas R, Paul P, Rao GN, et al. Present status of eye care in India. *Surv Ophthalmol* 2005;**50**(1):85-101
8. Marmamula S, Narsaiah S, Shekhar K, et al. Visual Impairment in the South Indian State of Andhra Pradesh: Andhra Pradesh - Rapid Assessment of Visual Impairment (AP-RAVI) Project. *PLoS One* 2013;**8**(7):e70120

- 1  
2  
3 9. Dandona R, Dandona L, Naduvilath TJ, et al. Utilisation of eyecare services in an urban  
4  
5 population in southern India: the Andhra Pradesh eye disease study. Br J Ophthalmol  
6  
7 2000;**84**(1):22-7  
8  
9
- 10 10. Kovai V, Krishnaiah S, Shamanna BR, et al. Barriers to accessing eye care services among  
11  
12 visually impaired populations in rural Andhra Pradesh, South India. Indian J  
13  
14 Ophthalmol 2007;**55**(5):365-71  
15  
16
- 17 11. StataCorp. Stata Statistical Software: Release 12. College Station, TX: StataCorp LP.,  
18  
19 2011.  
20  
21
- 22 12. Brilliant GE, Lepkowski JM, Zurita B, et al. Social determinants of cataract surgery  
23  
24 utilization in south India. The Operations Research Group. Archives of ophthalmology  
25  
26 1991;**109**(4):584-9  
27  
28
- 29 13. Finger RP. Cataracts in India: current situation, access, and barriers to services over time.  
30  
31 Ophthalmic Epidemiol 2007;**14**(3):112-8  
32  
33
- 34 14. Gupta SK, Murthy GV. Where do persons with blindness caused by cataracts in rural  
35  
36 areas of India seek treatment and why? Archives of ophthalmology  
37  
38 1995;**113**(10):1337-40  
39  
40
- 41 15. Marmamula S, Narsaiah S, Shekhar K, et al. Visual impairment among weaving  
42  
43 communities in Prakasam district in South India. PLoS One 2013;**8**(2):e55924 16.  
44  
45 Nirmalan PK, Katz J, Robin AL, et al. Utilisation of eye care services in rural south  
46  
47 India: the Aravind Comprehensive Eye Survey. Br J Ophthalmol 2004;**88**(10):1237-41  
48  
49
- 50 17. Fletcher AE, Donoghue M, Devavaram J, et al. Low uptake of eye services in rural India: a  
51  
52 challenge for programs of blindness prevention. Archives of ophthalmology  
53  
54 1999;**117**(10):1393-9  
55  
56  
57  
58  
59  
60

- 1  
2  
3 18. Anand R, Gupta A, Ram J, et al. Visual outcome following cataract surgery in rural  
4  
5 punjab. Indian J Ophthalmol 2000;**48**(2):153-8  
6  
7  
8 19. Dandona L, Dandona R, Anand R, et al. Outcome and number of cataract surgeries in  
9  
10 India: policy issues for blindness control. Clin Experiment Ophthalmol 2003;**31**(1):23-  
11  
12 31 doi: 595  
13  
14  
15 20. Khanna RC, Marmamula S, Krishnaiah S, et al. Changing trends in the prevalence of  
16  
17 blindness and visual impairment in a rural district of India: Systematic observations  
18  
19 over a decade. Indian J Ophthalmol 2012;**60**(5):492-7  
20  
21  
22 21. Khanna RC, Pallerla SR, Eeda SS, et al. Population based outcomes of cataract surgery in  
23  
24 three tribal areas of Andhra Pradesh, India: risk factors for poor outcomes. PLoS One  
25  
26 2012;**7**(5):e35701  
27  
28  
29 22. Khanna R, Raman U, Rao GN. Blindness and poverty in India: the way forward. Clinical &  
30  
31 experimental optometry : journal of the Australian Optometrical Association  
32  
33 2007;**90**(6):406-14.  
34  
35  
36 23. Rao GN. An infrastructure model for the implementation of VISION 2020: The Right to  
37  
38 Sight. Can J Ophthalmol 2004;**39**:589–94.  
39  
40  
41 24. Rao GN, Khanna RC, Athota SM, et al. Integrated model of primary and secondary eye  
42  
43 care for underserved rural areas: the L V Prasad Eye Institute experience. Indian J  
44  
45 Ophthalmol 2012;**60**(5):396-400.  
46  
47  
48  
49  
50  
51  
52  
53  
54  
55  
56  
57  
58  
59  
60

1  
2  
3  
4  
5  
6  
7  
8  
9  
10  
11  
12  
13  
14  
15  
16  
17  
18  
19  
20  
21  
22  
23  
24  
25  
26  
27  
28  
29  
30  
31  
32  
33  
34  
35  
36  
37  
38  
39  
40  
41  
42  
43  
44  
45  
46  
47  
48  
49  
50  
51  
52  
53  
54  
55  
56  
57  
58  
59  
60

Figure 1: Classification of barriers reasons for not utilizing eye care services among those  
with avoidable visual impairment

For peer review only



1  
2  
3 **A population based Cross sectional Study of Barriers to Uptake of Eye Care Services in**  
4 **South India: The Rapid Assessment of Visual Impairment (RAVI) Project**

5 Srinivas Marmamula<sup>1,2</sup>, Rohit C. Khanna<sup>1</sup>, Konegari Shekhar<sup>1</sup>

6  
7  
8 Gullapalli N Rao<sup>1,2</sup>

9  
10 <sup>1</sup> Allen Foster Community Eye Health Research Centre, Gullapalli Pratibha Rao International  
11 Centre for Advancement of Rural Eye care, L V Prasad Eye Institute, Hyderabad, India

12  
13 <sup>2</sup> Bausch & Lomb School of Optometry, L V Prasad Eye Institute, Hyderabad, India

14  
15  
16  
17  
18 **Running Head:** Barriers to uptake of eye care services in Andhra Pradesh, India

19  
20  
21 **Key words:** Visual Impairment; Cataract; Refractive errors; Barriers; Rapid assessment

22  
23 **Article Type:** Original article

24  
25  
26  
27  
28 **Address for correspondence:**

29  
30  
31 Srinivas Marmamula, M.Sc, PhD

32  
33 Allen Foster Community Eye Health Research Centre

34  
35 ICARE, L V Prasad Eye Institute,

36  
37 Road # 2, Banjara Hills, Hyderabad, India- 500034

38  
39  
40 E-mail: sriptom@lvpei.org

41  
42  
43  
44  
45  
46 **Manuscript word count:** 2364 words (excluding title page, abstract, references, figure  
47 legends and tables)

**ABSTRACT**

**Objective:** To assess the barriers to uptake of eye care services among those with avoidable impairment in the population aged  $\geq 40$  years in South India state of Andhra Pradesh.

**Design:** Cross-sectional study

**Setting:** Community Setting

**Participants:** Of 7800 subjects were enumerated from an urban and two rural locations using a two stage cluster random sampling methodology, 7378 (95%) were examined. Eye examinations were conducted using a rapid assessment protocol. Visual Impairment (VI) was defined as presenting visual acuity  $< 6/18$  in the better eye. For the purpose of this study, VI caused due to cataract or uncorrected refractive error was considered avoidable VI. A validated questionnaire was used to collect information on barriers for uptake of services among those who had avoidable VI.

**Primary Outcome:** Barriers to uptake of services among those with avoidable VI

**Results:** The prevalence of avoidable VI was 11.8% (95%:11.0–12.5; n=868). Among these, 71.1% (n=617) individuals reported 'person related' barriers while 28.9% (n=251) individuals reported 'service related' barriers to uptake of services. Among the 'person related' barriers, the leading barrier was 'lack of perceived need' (61.1%; n=377) for reasons such as old age, good vision in other eye. This was followed by 'no one to accompany' (20.3%; n=125). Of the 251 individuals who had 'service related' barriers, lack of affordability was the major barrier (76.1%; n=191) followed by lack of accessibility (12.7%; n=32). Over 11% (n=28) of the individuals were advised to wait for cataract surgery.

**Conclusions:** Person related barriers are more common than service related barriers in Andhra Pradesh. As the barriers trend more towards 'person related' phenomenon such as

1  
2  
3 person's attitude and 'felt need' to improve vision, newer and much intensive awareness  
4  
5 campaigns are needed to bring about an attitudinal / behavioral change among individuals  
6  
7  
8 to improve the uptake of services.  
9

## 10 11 12 13 14 **ARTICLE SUMMARY**

### 15 16 **Article focus**

- 17  
18 – Avoidable visual impairment is common in south Indian state of Andhra Pradesh.
- 19  
20 – Despite availability of services, several barriers limit the uptake of eye care services
- 21  
22 – Understanding and addressing the barriers is essential to tackle the challenge of  
23  
24 visual impairment  
25  
26  
27

### 28 29 **Key messages**

- 30  
31 – 'Person related' barriers are more common than 'service related' barriers in our  
32  
33 study population
- 34  
35 – Compared to earlier studies, there is trend towards 'person related' barriers  
36  
37 compared to 'service related' barriers
- 38  
39 – Lack of 'perceived need' and affordability are the leading barriers that prevent the  
40  
41 uptake of services in the study region  
42  
43  
44

### 45 46 **Strengths and limitations**

- 47  
48 – Large representative sample from three districts, a good response rate and sound  
49  
50 methodology are the strengths of the study
- 51  
52 – The division of barriers into 'person related' and 'service related' is arbitrary and  
53  
54 subject to discussion.  
55  
56  
57

1  
2  
3 With over 285 million visually impaired people worldwide, visual impairment is a major  
4  
5 global public health challenge.[1] Over 80% of the blindness is due to cataract and  
6  
7 uncorrected refractive errors, both of which have cost-effective solutions.[1, 2] While  
8  
9 technological advances have rendered cataract surgery safe, resulting in excellent  
10  
11 outcomes, this technology needs to be accessible to people in remote rural areas in  
12  
13 developing nations where visual impairment is more prevalent.[1] Making services available  
14  
15 is only a part of the larger solution to the global problem of visual impairment. Even in  
16  
17 places where services are available and accessible,[3] the uptake of services is determined  
18  
19 by several factors or barriers that must be addressed if we are to improve the uptake of  
20  
21 services and thereby reduce the prevalence of visual impairment. Research has shown that  
22  
23 the barriers to uptake of services tend to change over time due to several factors. [4, 5]  
24  
25 Hence research on changing trends is necessary to guide service delivery programmes for  
26  
27 planning strategies to address avoidable visual impairment in the community.  
28  
29  
30  
31  
32  
33  
34  
35

36 Andhra Pradesh is one of the largest states in India with an estimated population of 84  
37  
38 million in 2011.[6] It is administratively divided into twenty three districts which are further  
39  
40 divided into sub-districts (mandals which are rural) and municipalities (urban).[6] The  
41  
42 literacy rate is around 68% and nearly one third of the population resides in urban areas as  
43  
44 per Census 2011.[6] Similar to other parts of the country, eye care services are provided by  
45  
46 several non-government organizations, private hospitals and clinics, especially in urban  
47  
48 areas and by government hospitals.[7] In rural areas, several non-government organizations  
49  
50 conduct outreach screening programmes to identify people with cataract who are then  
51  
52  
53  
54  
55  
56  
57  
58  
59  
60

1  
2  
3 transported to a base eye hospital where cataract surgery is performed at 'no cost' to the  
4  
5 people and expenses are reimbursed by national programme for control of blindness, India.  
6  
7

8  
9  
10 We recently conducted a large population-based cross sectional study among adults 40  
11  
12 years and older in three locations (one urban and two rural) in Andhra Pradesh and reported  
13  
14 an age and gender adjusted prevalence of visual impairment of 14.3% (95% CI: 13.5 - 15.0)  
15  
16 including a blindness prevalence of 5.5% (95% CI: 5.0 – 6.0).[8] Refractive errors were the  
17  
18 leading cause of visual impairment accounting for 47.6% followed by cataract (43.7%).[8] In  
19  
20 this paper, we report the reasons for poor uptake of eye care services among those who are  
21  
22 visually impaired due to cataract or refractive errors in this study cohort and suggest  
23  
24 strategies to address these barriers.  
25  
26  
27  
28  
29  
30

## 31 **METHODS**

### 32 **Ethics Approval**

33  
34 The study protocol was reviewed and approved by Institutional Review Board (IRB) of  
35  
36 Hyderabad Eye Research Foundation, L V Prasad Eye Institute, Hyderabad, India. This study  
37  
38 adhered to the tenets of the Declaration of Helsinki. Verbal informed consent was obtained  
39  
40 from each subject after explaining the study procedures and before starting the eye  
41  
42 examination. The studies were carried out during 2011 and 2012.  
43  
44  
45  
46  
47  
48  
49

### 50 **Data Collection**

51  
52 The sampling process and the study protocol are described in detail elsewhere.[8] In brief, a  
53  
54 two stage cluster random sampling was used to select 7800 subjects from 156 study clusters  
55  
56  
57  
58  
59  
60

1  
2  
3 across three districts, Krishna (urban area), Khammam (rural) and Warangal (rural) in  
4  
5 Andhra Pradesh. In each randomly selected cluster, the study teams comprising of a vision  
6  
7 technician and a community eye health worker visited the selected households and  
8  
9 conducted eye examinations that included visual acuity assessment. Those with visual  
10  
11 impairment, defined as presenting visual acuity worse than 6/18 in the better eye were  
12  
13 identified. The investigators asked the question: 'why were services not sought despite  
14  
15 having visual impairment?' It was an open ended question and was asked in the local  
16  
17 language. The response given by the participants was matched with the responses that were  
18  
19 pre-listed on the data collection form and the response that was the closest was marked. If  
20  
21 a subject gave a response that was different to those listed, then it was fully documented in  
22  
23 the forms as 'others'. If the subject gave multiple responses, then a follow-up questioning  
24  
25 was asked to prioritize the response and the most important one was documented. The  
26  
27 responses used in the form were based on the questionnaire used in the previous studies in  
28  
29 India and were available in the local language. [3, 9, 10] To suggest strategies to increase  
30  
31 uptake of services, the responses were further categorized into two groups; a) Person  
32  
33 related barriers and b) Service related barriers. The proportion of visual impairment caused  
34  
35 due to cataract and refractive errors was considered as avoidable visual impairment in this  
36  
37 study.

38  
39  
40  
41  
42  
43  
44  
45  
46  
47 Data analysis was done using STATA statistical software version 12.[11] Chi square tests  
48  
49 were conducted to assess the association between the barriers quoted by the individuals  
50  
51 and socio-demographic variables. The point prevalence estimate for prevalence of avoidable  
52  
53  
54  
55  
56  
57  
58  
59  
60

1  
2  
3 blindness was calculated and reported along with 95% confidence intervals (CI). A p value of  
4  
5 0.05 (two-tailed) was considered as statistically significant for all the estimates.  
6  
7

## 8 9 10 **RESULTS**

11  
12 Among the 7800 enumerated from the three districts, 7378 (95%) individuals were available  
13  
14 for examination. Of those examined, 46.4% (n=3421) were male, 62% (n=4562) had no  
15  
16 education and 66.7% (n=4923) were from rural location. The mean age of those examined  
17  
18 was 51.7 years (standard deviation 10.9 years) compared to 52.8 years (standard deviation  
19  
20 9.9 years) of those not examined. The mean difference in age among those examined and  
21  
22 not examined was of borderline statistical significance (p=0.05). Women were more likely to  
23  
24 be examined compared to men (95.6% versus 93.5%; p<0.01).[8]  
25  
26  
27  
28

29  
30  
31 The overall prevalence of avoidable visual impairment was 11.8% (95% CI: 11.0 – 12.5;  
32  
33 n=868). It was 9.5% (95% CI: 8.4 – 10.8) and 12.9% (95% CI: 12.0 – 13.8) in urban and rural  
34  
35 areas respectively. The most common reason quoted for not seeking eye care services were  
36  
37 'Old age need not felt' (29.6%; n=257) followed by 'unable to afford the cost of services'  
38  
39 (22.0%; n=191) and no one to accompany (14.4%) followed by 'aware of the problem, but  
40  
41 can manage '(11.2%) (Table 1). 'No one to accompany' was quoted by 15.9% of the subjects  
42  
43 in the rural area compared to 10.3% in the urban area (p=0.04). 'Unaware of the problem'  
44  
45 and 'no time available / other priorities' was quoted more frequently by urban participants  
46  
47 compared to their rural peers (p<0.01). Other health reasons were significantly higher  
48  
49 among rural residents (p<0.01). The other reasons for not seeking eye care services were  
50  
51 similar between the groups (Table 1).  
52  
53  
54  
55  
56  
57

Table 1: Reasons for not utilizing care services (n=868)

| Responses                                          | Category | Urban<br>(n=234) | Rural<br>(n=634) | Total<br>(n=868) | Statistical<br>significance |
|----------------------------------------------------|----------|------------------|------------------|------------------|-----------------------------|
|                                                    |          | n (%)            | n (%)            | n (%)            |                             |
| Old age and need not felt                          | <b>P</b> | 70 (29.9)        | 187 (29.5)       | 257 (29.6)       | 0.13                        |
| Cannot afford                                      | <b>S</b> | 48 (20.5)        | 143 (22.6)       | 191 (22.0)       | 0.52                        |
| No one to accompany                                | <b>P</b> | 24 (10.3)        | 101 (15.9)       | 125 (14.4)       | <b>0.04</b>                 |
| Aware of the problem, but can manage               | <b>P</b> | 25 (10.7)        | 72 (11.4)        | 97 (11.2)        | 0.78                        |
| Fear of losing eyesight / operation / Consultation | <b>P</b> | 6 (2.6)          | 35 (5.5)         | 41 (4.7)         | 0.07                        |
| Services not available or very far                 | <b>S</b> | 11 (4.7)         | 21 (3.3)         | 32 (3.7)         | 0.34                        |
| Waiting for cataract to mature                     | <b>S</b> | 10 (4.3)         | 18 (2.8)         | 28 (3.2)         | 0.29                        |
| Other health reasons                               | <b>P</b> | 1 (0.4)          | 27 (4.3)         | 28 (3.2)         | <b>&lt;0.01</b>             |
| Unaware of the problem                             | <b>P</b> | 21 (9.0)         | 4 (0.6)          | 25 (2.9)         | <b>&lt;0.01</b>             |
| No time available / other priorities               | <b>P</b> | 15 (6.4)         | 6 (0.9)          | 21 (2.9)         | <b>&lt;0.01</b>             |
| One eye adequate vision / need not felt            | <b>P</b> | 3 (1.3)          | 20 (3.2)         | 23 (2.6)         | 0.13                        |
| <b>Total</b>                                       |          | <b>234 (100)</b> | <b>634 (100)</b> | <b>868 (100)</b> |                             |

*P=Person related barrier; S=Service related barrier*

When the above quoted reasons for not seeking eye care services were categorized into 'person related' and 'service related' barriers, of 868 individuals who had avoidable visual impairment, 71.1% (n=617) individuals reported 'person related' barriers while 28.9% (n=251) individuals reported 'service related' barriers for uptake of services. Among the 'person related' barriers, the leading barrier was 'lack of perceived need' (61.1%;n=377) for reasons such as old age, good vision in other eye. This was followed by 'no one to accompany' (20.3%;n=125) and 'fear of surgery or consultation' (6.6%;n=41).



Of the 251 individuals who had 'service related' barriers, lack of affordability was the major barrier (76.1%; n=191) followed by lack of accessibility (12.7%; n=32). Over 11% (n=28) of the individuals were advised by an eye care service provider to 'wait for cataract surgery' or 'waiting for cataract to mature' (Figure 1). Except for age groups, the service related and person related barriers were similar with respect to all other characteristics such as gender, education, area of residence, level and causes of visual impairment (Table 2).

Table 2: Categories of reasons for not utilizing eye care services stratified by socio-demographic variables and causes of visual impairment

|                                             | Total in the group with avoidable Visual impairment |     | Service related barriers (n=251) |     | Person related barriers (n=617) |  | p#              |
|---------------------------------------------|-----------------------------------------------------|-----|----------------------------------|-----|---------------------------------|--|-----------------|
|                                             | n                                                   | n   | %*                               | n   | %*                              |  |                 |
| <b>Age group (years)</b>                    |                                                     |     |                                  |     |                                 |  | <b>&lt;0.01</b> |
| 40 - 49                                     | 55                                                  | 25  | 10.0                             | 30  | 4.9                             |  |                 |
| 50 - 59                                     | 181                                                 | 69  | 27.5                             | 112 | 18.2                            |  |                 |
| 60 - 69                                     | 330                                                 | 97  | 38.6                             | 233 | 37.8                            |  |                 |
| 70 & above                                  | 302                                                 | 60  | 23.9                             | 242 | 39.2                            |  |                 |
| <b>Gender</b>                               |                                                     |     |                                  |     |                                 |  | <b>0.63</b>     |
| Male                                        | 381                                                 | 107 | 42.6                             | 275 | 44.6                            |  |                 |
| Female                                      | 487                                                 | 144 | 57.4                             | 343 | 55.6                            |  |                 |
| <b>Education</b>                            |                                                     |     |                                  |     |                                 |  | <b>0.58</b>     |
| No Education                                | 720                                                 | 211 | 84.1                             | 509 | 82.5                            |  |                 |
| Educated                                    | 148                                                 | 40  | 15.9                             | 108 | 17.5                            |  |                 |
| <b>Area of residence</b>                    |                                                     |     |                                  |     |                                 |  | <b>0.82</b>     |
| Urban                                       | 234                                                 | 69  | 27.5                             | 165 | 26.7                            |  |                 |
| Rural                                       | 634                                                 | 182 | 72.5                             | 452 | 73.3                            |  |                 |
| <b>Categories of visual impairment (VI)</b> |                                                     |     |                                  |     |                                 |  | <b>0.44</b>     |
| <6/18 - 6/60                                | 553                                                 | 155 | 61.8                             | 398 | 64.5                            |  |                 |
| <6/60                                       | 315                                                 | 96  | 38.2                             | 219 | 35.5                            |  |                 |
| <b>Cause of VI</b>                          |                                                     |     |                                  |     |                                 |  | <b>0.54</b>     |
| Cataract                                    | 401                                                 | 120 | 47.8                             | 281 | 45.5                            |  |                 |

|                  |            |            |       |            |       |  |
|------------------|------------|------------|-------|------------|-------|--|
| Refractive error | 467        | 131        | 52.2  | 336        | 54.5  |  |
| <b>Total</b>     | <b>868</b> | <b>251</b> | 100.0 | <b>617</b> | 100.0 |  |

\* Column percentages presented

# p values comparing the service related and person related barriers

## DISCUSSION

We found an overwhelming predominance of 'person related' barriers compared to 'service related' barriers compared to previous studies suggestive of a clear change in trends in barriers over time.[4, 9, 10, 12-14] Earlier studies that were conducted about two decades ago, revealed 'service related' barriers such as availability, accessibility, and affordability in sharp contrast to 'person related' barriers found in this study. [4, 9, 10, 12-14] In 1995, Gupta and colleagues reported distance as the leading barrier for uptake of services followed by economic and other reasons whereas accessibility was not a major barrier in the current study.[14]

In the last few decades, the availability of services has increased significantly due to efforts of several non-government agencies and the national programme for prevention of blindness. Despite this, lack of affordability continues to remain a concern and still is a leading barrier. Recent studies from Andhra Pradesh also reported economic reasons one of the leading barriers for uptake of services.[5, 15] Affordability was a leading barrier (41%), similar to that found in Tamil Nadu [16] (78.2%) and another study from an urban area Andhra Pradesh.[9] However in the rural component of this study, it was not an important barrier.[10] Though some services are provided at no cost, the indirect expenses such as lost wages, travel and other incidental expenses may be posing an economic hurdle for uptake

1  
2  
3 of services.[16, 17] The service delivery programmes need to consider ways to address the  
4  
5 issues related to 'indirect costs' by providing transport facilities.  
6  
7

8  
9  
10  
11  
12 Lack of escort was quoted more commonly in Karnataka (21.6%) and Tamil Nadu (58.2%)  
13 compared to 14.4% in the present study. [4, 16] However, 'waiting or was told to wait for  
14  
15 cataract surgery' was the leading reasons in the Karnataka study whereas it was reported  
16  
17 only by 3% of the respondents in our study.[4] These differences are indicative of the  
18  
19 changing trends in barriers for uptake of services over time. Similarly, the 'fear of surgery or  
20  
21 visual outcome after surgery' was more commonly reported from Tamil Nadu [17] and  
22  
23 Karnataka[4], compared to less than 5% of the participants in present study, again  
24  
25 suggestive of a changing trend.  
26  
27  
28  
29  
30  
31  
32

33  
34 The reasons such as fear of surgery, waiting or was told to wait for cataract to mature for  
35  
36 surgery are reminiscent of the days when ICCE (Intra capsular cataract extraction) was the  
37  
38 commonly performed procedure in the camp settings. In fact population-based studies that  
39  
40 were conducted over a decade ago in several parts of India revealed poor outcomes after  
41  
42 cataract surgery.[18, 19] However technological advances and increase in availability of  
43  
44 cataract surgical services support by National Programme for Control of Blindness (NPCB)  
45  
46 are resulting in better outcomes as evidenced by recent publications.[20, 21] However,  
47  
48 efforts are needed to pass this information on to the communities using effective  
49  
50 information, education and communication tools so that these barriers are addressed.  
51  
52  
53  
54 Similar is the case with those reporting about 'other commitments' that prevent them from  
55  
56  
57  
58  
59  
60

1  
2  
3 undergoing cataract surgery and 'old age' and 'need not felt'; there appears to be  
4  
5 perception in the community on the need for long period of rest after cataract surgery that  
6  
7 will keep them away from active work engagements a considerable periods of time. The  
8  
9 quick visual rehabilitation that is now possible with better surgical techniques at a low cost  
10  
11 even in small towns in India should be propagated more actively.  
12  
13

14  
15  
16  
17 Availability was reported by less than 5% of those with avoidable visual impairment in both  
18  
19 urban and rural areas in the present study suggesting increased availability of services. 'Old  
20  
21 age and need not felt' was reported by more nearly 30% of the respondents which relates to  
22  
23 individual attitudes. A significantly higher proportion of rural residents reported 'no one to  
24  
25 accompany' compared to their urban counterparts and overall it accounted for nearly 15  
26  
27 percent of the responses. This could be attributed to availability of services at much closer  
28  
29 distance or better conveyance in urban locations compared to rural locations.  
30  
31  
32

33  
34  
35  
36 The individuals who are aware of their visual impairment but do not perceive the need for  
37  
38 consultations owing to several reasons which are more challenging for service providers to  
39  
40 deal with as it is related to attitude. This finding was also reported in earlier studies in  
41  
42 different parts of India.[3, 10] Only effective IEC methods focused on relative ease and  
43  
44 safety of cataract surgery that can be undertaken now compared to the strenuous planning  
45  
46 and efforts of yester years may induce a proportion of these people to utilize the services.  
47  
48 The same holds true for those who don't perceive any eye problem despite having visual  
49  
50 impairment.  
51  
52  
53  
54  
55  
56  
57  
58  
59  
60

1  
2  
3 We did not find any difference in 'person related' and 'service related' barriers among those  
4  
5 with cataract and uncorrected refractive errors though they require a very different  
6  
7 intervention. This could be possible as the barriers question was asked to all those with  
8  
9 avoidable visual impairment and not specific to a cause. It is possible that a significant  
10  
11 proportion of people may not have known the cause of their visual impairment. It is also  
12  
13 possible that some of those who were visually impaired due to uncorrected refractive errors  
14  
15 felt that their visual impairment was due to cataract and not refractive errors and vice-  
16  
17 versa.  
18  
19  
20  
21  
22  
23

24 Our study is not free from limitations. As the participants were aware of the affiliation of the  
25  
26 study teams, the responses may have been biased (courtesy bias). Moreover, the earlier  
27  
28 studies were focused on cataract compared to avoidable visual impairment in our study,  
29  
30 though we found no difference in barriers with the avoidable causes of visual impairment.  
31  
32 Our data present the pointers that can help service providers plan strategies to address  
33  
34 them but by no means provide in-depth analysis on health seeking behaviors.  
35  
36  
37  
38  
39  
40

41 In conclusion, as the barriers trend more towards 'person related' phenomenon such as  
42  
43 person's attitude and 'felt need' to improve vision, newer and much intensive awareness  
44  
45 campaigns are needed to bring about an attitudinal / behavioral change among individuals  
46  
47 to improve the uptake of services. Only such focused and innovative approaches can  
48  
49 improve uptake of services through which the goal of eliminating avoidable visual  
50  
51 impairment can be achieved.[22-24]  
52  
53  
54  
55  
56  
57  
58  
59  
60

### **FUNDING SUPPORT AND CONTRIBUTORSHIP STATEMENT**

The financial support for this study was provided by Hyderabad Eye Research Foundation, India. SM conceived the idea, designed and conducted the study and wrote the manuscript. KS assisted in data collection and supervised the field activities. RCK and GNR reviewed the earlier version of the manuscripts and provide the intellectual inputs.

### **DATA SHARING STATEMENT**

No additional data available

### **ACKNOWLEDGEMENTS**

Authors thank S Narsaiah, K Eswara Rao, Ch. Rajesh, D Susheel Kumar, N Raja Shekar Reddy, S Narahari, B Raghavendra and D Raghuswamy for their assistance in field work and data collection. LVPEI acknowledges the volunteers for their participation the study. Dr.Sreedevi Yadavalli is acknowledged for her language inputs on earlier versions of the manuscript. Authors are thankful to Dr.Usha Raman (University of Hyderabad) and Prof. Jill Keeffe for their comments on the earlier versions of this manuscript.

**Financial Support:** This study was funded by the Hyderabad Eye Research Foundation, India.

**Competing Interests:** None

## REFERENCES

1. Pascolini D, Mariotti SP. Global estimates of visual impairment: 2010. *Br J Ophthalmol* 2012;**96**(5):614-8
2. Lansingh VC, Carter MJ, Martens M. Global cost-effectiveness of cataract surgery. *Ophthalmology* 2007;**114**(9):1670-8
3. Marmamula S, Keeffe JE, Raman U, Rao GN. Population-based cross-sectional study of barriers to utilisation of refraction services in South India: Rapid Assessment of Refractive Errors (RARE) Study. *BMJ open* 2011;**1**(1):e000172
4. Vaidyanathan K, Limburg H, Foster A, Pandey RM. Changing trends in barriers to cataract surgery in India. *Bulletin of the World Health Organization* 1999;**77**(2):104-9
5. Finger RP, Ali M, Earnest J, Nirmalan PK. Cataract surgery in Andhra Pradesh state, India: an investigation into uptake following outreach screening camps. *Ophthalmic Epidemiol* 2007;**14**(6):327-32
6. Census 2011. Registrar General and Census Commissioner, Census of India 2011. In: Ministry of Home Affairs, Government of India, eds. New Delhi, 2011.
7. Thomas R, Paul P, Rao GN, Muliylil JP, Mathai A. Present status of eye care in India. *Surv Ophthalmol* 2005;**50**(1):85-101
8. Marmamula S, Narsaiah S, Shekhar K, Khanna RC, Rao GN. Visual Impairment in the South Indian State of Andhra Pradesh: Andhra Pradesh - Rapid Assessment of Visual Impairment (AP-RAVI) Project. *PLoS One* 2013;**8**(7):e70120

- 1  
2  
3 9. Dandona R, Dandona L, Naduvilath TJ, McCarty CA, Rao GN. Utilisation of eyecare services  
4  
5 in an urban population in southern India: the Andhra Pradesh eye disease study. Br J  
6  
7 Ophthalmol 2000;**84**(1):22-7  
8  
9
- 10 10. Kovai V, Krishnaiah S, Shamanna BR, Thomas R, Rao GN. Barriers to accessing eye care  
11  
12 services among visually impaired populations in rural Andhra Pradesh, South India.  
13  
14 Indian J Ophthalmol 2007;**55**(5):365-71  
15  
16
- 17 11. StataCorp. Stata Statistical Software: Release 12. College Station, TX: StataCorp LP.,  
18  
19 2011.  
20  
21
- 22 12. Brilliant GE, Lepkowski JM, Zurita B, Thulasiraj RD. Social determinants of cataract  
23  
24 surgery utilization in south India. The Operations Research Group. Archives of  
25  
26 ophthalmology 1991;**109**(4):584-9  
27  
28
- 29 13. Finger RP. Cataracts in India: current situation, access, and barriers to services over time.  
30  
31 Ophthalmic Epidemiol 2007;**14**(3):112-8  
32  
33
- 34 14. Gupta SK, Murthy GV. Where do persons with blindness caused by cataracts in rural  
35  
36 areas of India seek treatment and why? Archives of ophthalmology  
37  
38 1995;**113**(10):1337-40  
39  
40
- 41 15. Marmamula S, Narsaiah S, Shekhar K, Khanna RC. Visual impairment among weaving  
42  
43 communities in Prakasam district in South India. PLoS One 2013;**8**(2):e55924  
44  
45 16. Nirmalan PK, Katz J, Robin AL, et al. Utilisation of eye care services in rural south  
46  
47 India: the Aravind Comprehensive Eye Survey. Br J Ophthalmol 2004;**88**(10):1237-41  
48  
49
- 50 17. Fletcher AE, Donoghue M, Devavaram J, et al. Low uptake of eye services in rural India: a  
51  
52 challenge for programs of blindness prevention. Archives of ophthalmology  
53  
54 1999;**117**(10):1393-9  
55  
56  
57  
58  
59  
60



- 1  
2  
3 18. Anand R, Gupta A, Ram J, Singh U, Kumar R. Visual outcome following cataract surgery in  
4  
5 rural punjab. Indian J Ophthalmol 2000;**48**(2):153-8  
6  
7  
8 19. Dandona L, Dandona R, Anand R, Srinivas M, Rajashekar V. Outcome and number of  
9  
10 cataract surgeries in India: policy issues for blindness control. Clin Experiment  
11  
12 Ophthalmol 2003;**31**(1):23-31 doi: 595  
13  
14  
15 20. Khanna RC, Marmamula S, Krishnaiah S, Giridhar P, Chakrabarti S, Rao GN. Changing  
16  
17 trends in the prevalence of blindness and visual impairment in a rural district of  
18  
19 India: Systematic observations over a decade. Indian J Ophthalmol 2012;**60**(5):492-7  
20  
21  
22 21. Khanna RC, Pallerla SR, Eeda SS, et al. Population based outcomes of cataract surgery in  
23  
24 three tribal areas of Andhra Pradesh, India: risk factors for poor outcomes. PLoS One  
25  
26 2012;**7**(5):e35701  
27  
28  
29 22. Khanna R, Raman U, Rao GN. Blindness and poverty in India: the way forward. Clinical &  
30  
31 experimental optometry : journal of the Australian Optometrical Association  
32  
33 2007;**90**(6):406-14.  
34  
35  
36 23. Rao GN. An infrastructure model for the implementation of VISION 2020: The Right to  
37  
38 Sight. Can J Ophthalmol 2004;**39**:589-94.  
39  
40  
41 24. Rao GN, Khanna RC, Athota SM, Rajshekar V, Rani PK. Integrated model of primary and  
42  
43 secondary eye care for underserved rural areas: the L V Prasad Eye Institute  
44  
45 experience. Indian J Ophthalmol 2012;**60**(5):396-400.  
46  
47  
48  
49  
50  
51  
52  
53  
54  
55  
56  
57  
58  
59  
60

1  
2  
3  
4  
5  
6 Figure 1: Classification of barriers reasons for not utilizing eye care services among those  
7  
8 with avoidable visual impairment  
9  
10  
11  
12  
13  
14  
15  
16  
17  
18  
19  
20  
21  
22  
23  
24  
25  
26  
27  
28  
29  
30  
31  
32  
33  
34  
35  
36  
37  
38  
39  
40  
41  
42  
43  
44  
45  
46  
47  
48  
49  
50  
51  
52  
53  
54  
55  
56  
57  
58  
59  
60

For peer review only

1  
2  
3  
4  
5  
6  
7  
8  
9  
10  
11  
12  
13  
14  
15  
16  
17  
18  
19  
20  
21  
22  
23  
24  
25  
26  
27  
28  
29  
30  
31  
32  
33  
34  
35  
36  
37  
38  
39  
40  
41  
42  
43  
44  
45  
46  
47  
48  
49  
50  
51  
52  
53  
54  
55  
56  
57  
58  
59  
60

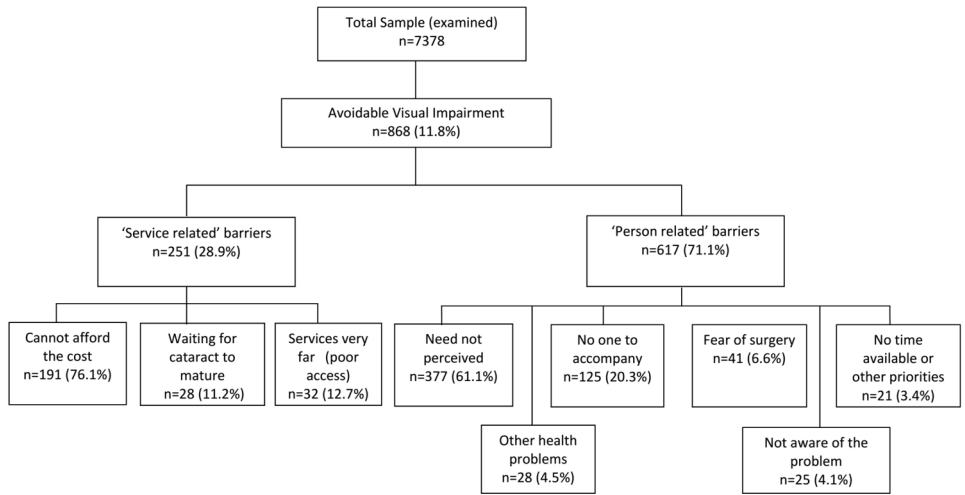

Classification of barriers for not utilizing eye care services among those with avoidable visual impairment  
178x90mm (300 x 300 DPI)

For peer review only

STROBE 2007 (v4) Statement—Checklist of items that should be included in reports of *cross-sectional studies*

| Section/Topic                | Item # | Recommendation                                                                                                                                                                       | Reported on page # |
|------------------------------|--------|--------------------------------------------------------------------------------------------------------------------------------------------------------------------------------------|--------------------|
| Title and abstract           | 1      | (a) Indicate the study's design with a commonly used term in the title or the abstract                                                                                               | 2                  |
|                              |        | (b) Provide in the abstract an informative and balanced summary of what was done and what was found                                                                                  | 2                  |
| <b>Introduction</b>          |        |                                                                                                                                                                                      |                    |
| Background/rationale         | 2      | Explain the scientific background and rationale for the investigation being reported                                                                                                 | 3                  |
| Objectives                   | 3      | State specific objectives, including any prespecified hypotheses                                                                                                                     | 4                  |
| <b>Methods</b>               |        |                                                                                                                                                                                      |                    |
| Study design                 | 4      | Present key elements of study design early in the paper                                                                                                                              | 4,5                |
| Setting                      | 5      | Describe the setting, locations, and relevant dates, including periods of recruitment, exposure, follow-up, and data collection                                                      | 4,5                |
| Participants                 | 6      | (a) Give the eligibility criteria, and the sources and methods of selection of participants                                                                                          | 4,5                |
| Variables                    | 7      | Clearly define all outcomes, exposures, predictors, potential confounders, and effect modifiers. Give diagnostic criteria, if applicable                                             | 4,5                |
| Data sources/<br>measurement | 8*     | For each variable of interest, give sources of data and details of methods of assessment (measurement). Describe comparability of assessment methods if there is more than one group |                    |
| Bias                         | 9      | Describe any efforts to address potential sources of bias                                                                                                                            |                    |
| Study size                   | 10     | Explain how the study size was arrived at                                                                                                                                            | 5                  |
| Quantitative variables       | 11     | Explain how quantitative variables were handled in the analyses. If applicable, describe which groupings were chosen and why                                                         |                    |
| Statistical methods          | 12     | (a) Describe all statistical methods, including those used to control for confounding                                                                                                | 5                  |
|                              |        | (b) Describe any methods used to examine subgroups and interactions                                                                                                                  |                    |
|                              |        | (c) Explain how missing data were addressed                                                                                                                                          |                    |
|                              |        | (d) If applicable, describe analytical methods taking account of sampling strategy                                                                                                   |                    |
|                              |        | (e) Describe any sensitivity analyses                                                                                                                                                |                    |
| <b>Results</b>               |        |                                                                                                                                                                                      |                    |

|                          |     |                                                                                                                                                                                                                                                                                                                                                                                                               |       |
|--------------------------|-----|---------------------------------------------------------------------------------------------------------------------------------------------------------------------------------------------------------------------------------------------------------------------------------------------------------------------------------------------------------------------------------------------------------------|-------|
| Participants             | 13* | (a) Report numbers of individuals at each stage of study—eg numbers potentially eligible, examined for eligibility, confirmed eligible, included in the study, completing follow-up, and analysed<br>(b) Give reasons for non-participation at each stage<br>(c) Consider use of a flow diagram                                                                                                               | 6     |
| Descriptive data         | 14* | (a) Give characteristics of study participants (eg demographic, clinical, social) and information on exposures and potential confounders<br>(b) Indicate number of participants with missing data for each variable of interest                                                                                                                                                                               | 6     |
| Outcome data             | 15* | Report numbers of outcome events or summary measures                                                                                                                                                                                                                                                                                                                                                          |       |
| Main results             | 16  | (a) Give unadjusted estimates and, if applicable, confounder-adjusted estimates and their precision (eg, 95% confidence interval). Make clear which confounders were adjusted for and why they were included<br>(b) Report category boundaries when continuous variables were categorized<br>(c) If relevant, consider translating estimates of relative risk into absolute risk for a meaningful time period | 6     |
| Other analyses           | 17  | Report other analyses done—eg analyses of subgroups and interactions, and sensitivity analyses                                                                                                                                                                                                                                                                                                                |       |
| <b>Discussion</b>        |     |                                                                                                                                                                                                                                                                                                                                                                                                               |       |
| Key results              | 18  | Summarise key results with reference to study objectives                                                                                                                                                                                                                                                                                                                                                      | 9,10  |
| Limitations              | 19  | Discuss limitations of the study, taking into account sources of potential bias or imprecision. Discuss both direction and magnitude of any potential bias                                                                                                                                                                                                                                                    | 11,12 |
| Interpretation           | 20  | Give a cautious overall interpretation of results considering objectives, limitations, multiplicity of analyses, results from similar studies, and other relevant evidence                                                                                                                                                                                                                                    | 11,12 |
| Generalisability         | 21  | Discuss the generalisability (external validity) of the study results                                                                                                                                                                                                                                                                                                                                         | 12    |
| <b>Other information</b> |     |                                                                                                                                                                                                                                                                                                                                                                                                               |       |
| Funding                  | 22  | Give the source of funding and the role of the funders for the present study and, if applicable, for the original study on which the present article is based                                                                                                                                                                                                                                                 | 12    |

\*Give information separately for cases and controls in case-control studies and, if applicable, for exposed and unexposed groups in cohort and cross-sectional studies.

**Note:** An Explanation and Elaboration article discusses each checklist item and gives methodological background and published examples of transparent reporting. The STROBE checklist is best used in conjunction with this article (freely available on the Web sites of PLoS Medicine at <http://www.plosmedicine.org/>, Annals of Internal Medicine at <http://www.annals.org/>, and Epidemiology at <http://www.epidem.com/>). Information on the STROBE Initiative is available at [www.strobe-statement.org](http://www.strobe-statement.org).
